1 **Research Article**

2 ***Clostridioides difficile* spore-entry into intestinal epithelial cells**  
3 **contributes to recurrence of the disease.**

4  
5 Pablo Castro-Córdova<sup>1,2</sup>, Paola Mora-Urbe<sup>1</sup>, Rodrigo Reyes-Ramírez<sup>1,2</sup>, Glenda Cofré-  
6 Araneda<sup>1</sup>, Josué Orozco-Aguilar<sup>1,2</sup>, Christian Brito-Silva<sup>1,2</sup>, María José Mendoza-León<sup>1,2</sup>,  
7 Sarah A. Kuehne<sup>3</sup>, Nigel P., Minton<sup>4</sup>, Marjorie Pizarro-Guajardo<sup>1,2,5</sup> and Daniel Paredes-  
8 Sabja<sup>1,2,5\*</sup>.

9  
10 <sup>1</sup>Microbiota-Host Interactions and Clostridia Research Group, Facultad de Ciencias de la  
11 Vida, Universidad Andrés Bello, Santiago, Chile.

12 <sup>2</sup>Millennium Nucleus in the Biology of Intestinal Microbiota, Santiago, Chile.

13 <sup>3</sup>School of Dentistry and Institute for Microbiology and Infection, University of  
14 Birmingham, Birmingham, UK.

15 <sup>4</sup>BBSRC/EPSRC Synthetic Biology Research Centre, School of Life Sciences, Centre for  
16 Biomolecular Sciences, The University of Nottingham, Nottingham, United Kingdom.

17 <sup>5</sup>Department of Biology, Texas A&M University, College Station, TX, 77843, USA.

18  
19 Running Title: Internalization of *C. difficile* spores into IECs and effect in pathogenesis

20  
21 Key Words: *C. difficile* spore, spore internalization, recurrent *C. difficile* infection, animal  
22 model.

23

24 **\*Corresponding author:**

25 Dr. Daniel Paredes-Sabja, Department of Biology, Texas A&M University, College

26 Station, TX, 77843, USA. E-mail: [dparedes-sabja@bio.tamu.edu](mailto:dparedes-sabja@bio.tamu.edu)

27

28 **Abstract**

29 *Clostridioides difficile* spores produced during infection are essential for the recurrence of  
30 the disease. However, how *C. difficile* spores persist in the intestinal mucosa to cause  
31 recurrent infection remains unknown. Here, we show that *C. difficile* spores gain entry into  
32 the intestinal mucosa via fibronectin- $\alpha_5\beta_1$  and vitronectin- $\alpha_v\beta_1$  specific-pathways. The  
33 spore-surface exosporium BclA3 protein is essential for both spore-entry pathways into  
34 intestinal epithelial cells. Furthermore, *C. difficile* spores of a *bclA3* isogenic mutant  
35 exhibited reduced entry into the intestinal mucosa and reduced recurrence of the disease in  
36 a mouse model of the disease. Inhibition of *C. difficile* spore-entry led to reduced spore-  
37 entry into the intestinal epithelial barrier and recurrence of *C. difficile* infection *in vivo*.  
38 These findings suggest that *C. difficile* spore-entry into the intestinal barrier is a novel  
39 mechanism of spore-persistence that can contribute to infection recurrence and have  
40 implications for the rational design of therapies.

41

42 **Introduction.**

43 *Clostridioides difficile* is a strict anaerobic Gram-positive pathogenic bacterium that  
44 forms highly resistant spores that easily persist in the environment and contribute to  
45 transmission of *C. difficile* infections (CDI) through fecal-oral route<sup>1</sup>. Disruption of the gut  
46 microbiota by the use of broad-spectrum antibiotics leads to an optimal environment for *C.*  
47 *difficile* colonization and proliferation in the colon and disease manifestation. CDI currently  
48 leads hospital-acquired diarrhea associated to antibiotics in United States and world-wide<sup>2</sup>.  
49 In the US alone, ~500,000 patients per year become infected with CDI, and mortality rates  
50 reach ~8% of total patients<sup>2</sup>. The annual cost of CDI to the health care system is estimated  
51 in ~US 4.8 billion<sup>2</sup>. Treatment of CDI usually involves antibiotic therapy, typically  
52 vancomycin or metronidazole and, most recently, fidaxomicin<sup>2</sup>, which, although resolves  
53 the infection in ~95% of the cases, leads to recurrence of CDI (R-CDI) in 15-30% of the  
54 individuals<sup>3-5</sup>.

55  
56 During infection, *C. difficile* produces two major virulence factors, toxins TcdA and  
57 TcdB, which are responsible for the clinical manifestation of the disease, induce pro-  
58 inflammatory cytokines, disruption of tight junctions, detachment of intestinal epithelial  
59 cells (IEC) and loss of trans-epithelial barrier<sup>6</sup>. *C. difficile* also initiates a sporulation  
60 pathway that leads to the production of new metabolically dormant spores in the host's  
61 intestine<sup>1</sup>. *In vivo*, spore-formation is essential for the recurrence of the disease<sup>7</sup>. Moreover,  
62 spore-based therapies that remove *C. difficile* spores from the intestinal mucosa contribute  
63 to reduce recurrence of the disease in animal models<sup>8</sup>.

64

65           Recent *in vivo* studies in the laboratory strain 630 suggest that the spore surface  
66 mucus-binding protein, peroxiredoxin-chitinase CotE, and the exosporium collagen-like  
67 BclA1 proteins are required for the colonization and infectivity in a mouse model of  
68 CDI<sup>9,10</sup>. However, the surface layer of 630 spores does not resemble that of clinically  
69 relevant strains which exhibit hair-like projections in their spore surface; structures that are  
70 absent in strain 630<sup>1,11,12</sup>. Importantly, most clinically relevant sequenced *C. difficile*  
71 isolates, including isolates of the epidemically relevant 027 ribotype, have a truncated  
72 *bclA1* due to a premature stop codon in the N-terminal domain<sup>13</sup>, resulting in the translation  
73 of a small polypeptide, which localizes to the spore surface<sup>10</sup>; thus limiting the breadth and  
74 depth of these results.

75

76           *C. difficile* spores exhibit high levels of adherence to intestinal epithelial cells  
77 (IECs) *in vitro*<sup>14,15</sup>, and that the hair-like projections of *C. difficile* spores come in close  
78 proximity with the microvilli of differentiated Caco-2 cells; furthermore, *C. difficile* spores  
79 interact in a dose-dependent manner with fibronectin (Fn) and vitronectin (Vn)<sup>15</sup>, two  
80 extracellular matrix proteins used by several enteric pathogens to infect the host<sup>16,17</sup>.  
81 However, the mechanisms that underline how these interactions contribute to *C. difficile*  
82 spore-persistence *in vivo* and contribute to the recurrence of the disease remain unclear.

83

84           Herein we first demonstrate that *C. difficile* spores gain entry into the intestinal  
85 epithelial barrier of mice and that spore-entry into IECs requires serum-molecules,  
86 specifically Fn and Vn, that are luminary accessible in the colonic mucosa. We also  
87 demonstrate that the spore-entry pathway into IECs is Fn- $\alpha_5\beta_1$  and Vn- $\alpha_v\beta_1$ . Next, we  
88 demonstrate that the spore surface collagen-like BclA3 protein is essential for spore-entry

89 into IECs through these pathways *in vitro* and essential for spore adherence to the intestinal  
90 mucosa. Importantly, BclA3 contributes to the recurrence of the disease in mice. We also  
91 observed the therapeutic potential of blocking spore-entry into the intestinal epithelial  
92 barrier and how co-administration of nystatin with vancomycin reduces spore-persistence  
93 and R-CDI in mice. Together, our results reveal a novel mechanism employed by *C.*  
94 *difficile* spores that contributes to R-CDI, which involves gaining intracellular access into  
95 the intestinal barrier via BclA3-Fn- $\alpha_5\beta_1$  and BclA3-Vn- $\alpha_v\beta_1$  specific, and that blocking  
96 spore-entry contributes to reduced recurrence of the disease.

97

## 98 **Results**

99 ***C. difficile* spores internalize into the intestinal barrier *in vivo*.** To study the interaction  
100 of *C. difficile* spores and the host's intestinal barrier, we used a colonic/ileal loop assay  
101 infected with *C. difficile* spores for 5 hours<sup>18</sup>, where *C. difficile* R20291 spores, were  
102 labeled with anti-spore antibodies<sup>13,18</sup>. We observed similar levels of adherence of *C.*  
103 *difficile* spores to the colonic and ileum mucosa (Fig. 1 a–c), with no preference for the site  
104 of spore-adherence in both colonic and ileum mucosa (Fig. 1d, Extended Data Fig. 1 and  
105 2). Strikingly, we observed that *C. difficile* spores were able to cross the mucosal barrier in  
106 the colonic/ileal loop assay (Fig. 1a, b, e, f, Supplementary Video 1 and 2 and Extended  
107 Data Fig. 3, and 4). We observed that 4.6 and 3.7 spores per  $10^5 \mu\text{m}^{-2}$  were able to cross the  
108 mucosal barrier in colonic and ileal loops (Fig. 1e), corresponding to  $0.92\% \pm 0.30\%$  and  
109  $1.04\% \pm 0.48$  of the total spores, respectively. In the colonic mucosa internalized *C. difficile*  
110 spores were found to homogeneously localize 10 to 30  $\mu\text{m}$  from the colonic surface and 5  
111 to 50  $\mu\text{m}$  from the closest crypt membrane, while in the ileum mucosa spores were

112 homogeneously found at 15 to 70  $\mu\text{m}$  from the villus tip and 10 to 50  $\mu\text{m}$  from the villus  
113 membrane in ileal loops, ([Extended Data Fig. 5](#)), indicating multiple sites of entry in colon  
114 and ileum.

115

116 ***C. difficile* spore-entry into intestinal epithelial cells requires serum components *in***  
117 ***vitro*.**

118 Our previous *in vitro* studies in IECs were conducted in the absence of fetal bovine serum  
119 (FBS) and did not evidence internalized spores<sup>14,15,18,19</sup>. Therefore, we assess if FBS  
120 contributed to spore-entry by confocal fluorescence microscopy by analyzing monolayers  
121 of polarized T84 IECs ([Fig. 2a](#) and [Extended Data Fig. 6a, b](#)) and differentiated Caco-2  
122 cells ([Extended Data Fig. 6c, d](#)) which were infected with *C. difficile* spores of the  
123 epidemically relevant R20291 and the commonly used strain 630 in the presence of FBS. In  
124 both cell lines, several intracellular spores of strain *C. difficile* 630 were found to be located  
125 between the apical and basal actin cytoskeleton ([Fig. 2a](#) and [Extended Data Fig 6](#)). To  
126 obtain convincing evidence of entry of *C. difficile* spores into IECs, we analyzed polarized  
127 monolayers of T84 and Caco-2 cell lines infected with *C. difficile* 630 or R20291 spores  
128 using transmission electron microscopy (TEM). Electron micrographs evidence that some  
129 *C. difficile* spores were found extracellularly in the apical membrane, while others were  
130 found intracellularly ([Fig. 2b–d](#)). Intracellular *C. difficile* spores were surrounded by an  
131 endosomal-like membrane ([Fig. 2c, d](#)). Notably, the formation of membrane lamellipodia-  
132 like protrusions and circular ruffle surrounding *C. difficile* 630 spores were evidenced at the  
133 site of attachment of *C. difficile* spores to the apical membrane ([Fig. 2e](#)), suggesting

134 macropinocytosis-like endocytosis of *C. difficile* spores. Intracellular spores of the strain,  
135 R20291, were also evidenced in differentiated Caco-2 cells (Fig. 2f–h).

136 Next, to quantitatively assess the internalization of *C. difficile* spores into non-  
137 phagocytic cells, we developed an exclusion assay in which, in non-permeabilized cells,  
138 only extracellular spores are fluorescently labeled with anti-*C. difficile* spore antibody,  
139 while total spores can be quantified by phase-contrast microscopy; intracellular spores are  
140 not stained by anti-*C. difficile* spore antibody (absence of fluorescence) and are only  
141 detectable by phase-contrast microscopy (Extended Data Fig. 7a). With this assay, we  
142 probed that entry of 630 and R20291 spores into monolayers of Caco-2, T84, Vero, and  
143 HT29 cell lines significantly increased in the presence of FBS (Fig. 2i, j), as well as with  
144 serum from various mammalian species (Fig. 2k). The percentage of internalized spores of  
145 630 and R20291 strains was highest at 5 h post-infection in Caco-2 and T84 cells  
146 (Extended Data Fig. 7b, c). Spores of various clinically relevant ribotypes were able to  
147 internalize into Caco-2 cells (Extended Data Fig. 7d). Overall, these results demonstrate  
148 that *C. difficile* spores are able to gain intracellular entry into non-phagocytic cells and that  
149 spore-entry is serum-dependent *in vitro*.

150

151 ***C. difficile* spore-entry into intestinal epithelial cells requires Fn and Vn.** Fn and Vn are  
152 extracellular matrix proteins, which are also present in mammal serum and are widely used  
153 by enteric pathogens to infect host cells<sup>16,17</sup>. We have shown previously that both, Fn and  
154 Vn, bind in a concentration-dependent manner to *C. difficile* spores<sup>15</sup>. To assess whether  
155 serum Fn and Vn contribute to *C. difficile* spore-entry, we evaluated the internalization  
156 assay in the presence of RGD peptide to block the interaction of Fn and Vn with their  
157 cognate receptors through the RGD binding domain<sup>20,21</sup>. RGD significantly reduced the



158 extent of spore-entry into differentiated Caco-2 cells in the presence of human serum by  
159 ~45% (Figure 3a, Extended Data Fig. 8a), indicating that serum Fn and Vn might be  
160 involved in *C. difficile* spore-entry in an RGD specific manner; by contrast, no decrease in  
161 adherence of *C. difficile* spores was evidenced in the presence of RGD (Fig. 3b, Extended  
162 Data Fig. 8b). Similar results were observed in undifferentiated Caco-2 cells (Extended  
163 Data Fig. 8c–f). We confirmed these results by showing that the infection with spores pre-  
164 incubated with Fn or Vn restored spore-entry into differentiated (Fig. 3c) and  
165 undifferentiated Caco-2 cells (Extended Data Fig. 9a), but had no impact in spore-  
166 adherence to differentiated (Fig. 3d) and undifferentiated Caco-2 cells (Extended Data Fig.  
167 9b). Similar results were observed in differentiated Caco-2 cells pre-treated with Fn or Vn  
168 before infection with *C. difficile* spores (Extended Data Fig. 9c, d), confirming that the  
169 presence of Fn and Vn mediates *C. difficile* spore-entry.

170

171 **Intestinal barrier sites with accessible Fn and Vn.** Both Fn and Vn are mainly located in  
172 the basal and basolateral membrane of epithelial cells where tight and adherent junctions  
173 are formed<sup>16,17</sup>. However, several the epithelial barrier suffers reorganization and/or  
174 disruption of tight and adherent junctions such as cell extrusion sites, goblet cells (GCs), at  
175 cell-cell junctions with neighboring cells and along villus epithelial folds<sup>22-24</sup>. Therefore,  
176 we hypothesized that sites undergoing adherent junction rearrangement also contained  
177 accessible Fn and Vn. We performed double staining, in which lumenally accessible Fn and  
178 E-cadherin (Ecad), a marker for reorganization or disruption of adherent junctions<sup>22</sup>, were  
179 stained in non-permeabilized tissue. We first determined the relative number of IECs in the  
180 colonic tissue that expresses lumenally accessible Ecad and found that nearly 16% of the  
181 IECs have this feature (Fig. 3h). Accessible Fn and Vn were observed in 27% and 14% of

182 the IECs cells (Fig. 3i and 3k). We observed that most of the cells that had lumenally  
183 accessible Fn or Vn also had accessible Ecad (Fig. 3j, l), and are likely undergoing major  
184 reorganization of the adherent junctions. However, a small fraction of epithelial cells with  
185 accessible Fn (33%) or Vn (12%) had no accessible Ecad (Fig. 3i, k). Lumenally accessible  
186 Ecad has been previously found around mucus-expelling GCs in mice intestinal tissue<sup>22</sup>.  
187 Therefore, to quantify the relative abundance of GCs with accessible Ecad in our  
188 experimental conditions, we performed double immunostaining for accessible Ecad and the  
189 GC-specific marker Muc2<sup>22,25</sup>. We observed that 13% of the IECs were positive for Muc2  
190 in colonic tissue (Fig. 3m) and all of Muc2-positive cells were positive for accessible Ecad  
191 (Fig. 3n). Lumenally accessible Ecad has also been observed in mice ileal tissue<sup>22</sup>; we  
192 observed that nearly 17% of the IECs of mice ileal had luminal accessible Ecad (Extended  
193 data Fig. 10a, b). Next we quantified the relative abundance of GCs in the ileum mucosa  
194 and observed that nearly 9% of total IECs were positive for Muc2 (Extended Data Fig.  
195 10c), of which 70% were positives for accessible Ecad (Extended Data Fig. 10d). This data  
196 supports the notion that Fn and Vn are also accessible in the intestinal epithelial barrier.  
197 Altogether, these results demonstrate the existence of sites in the intestinal barrier that  
198 undergo reorganization of adherent junctions that exhibit accessible Fn and Vn through  
199 which *C. difficile* spores can gain entry into the intestinal barrier.

200

201 ***C. difficile* spores internalize via Fn- $\alpha_5\beta_1$  and Vn- $\alpha_v\beta_1$  integrin *in vitro*.** The Fn RGD  
202 loop between domains FnIII9 and FnIII10 enhances binding between Fn and  $\alpha_5\beta_1$   
203 integrin<sup>16</sup>; Vn also has a similar RGD loop that enhances binding to  $\alpha_v\beta_1$  integrin<sup>17</sup>. To  
204 address whether binding of Fn and Vn to their cognate integrin receptors is required for *C.*

205 *difficile* spore-entry into IECs, monolayers of Caco-2 cells were infected with *C. difficile*  
206 R20291 spores in the presence of the inhibitory RGD peptide, showing that in the presence  
207 of Fn or Vn, increasing concentrations of RGD progressively decreased spore-entry into  
208 differentiated (Fig. 4a, b) and into undifferentiated Caco-2 cells (Extended Data Fig. 11a,  
209 c), but not spore-adherence (Fig. 4c, d, Extended Data Fig. 10b, d) to Caco-2 cells. Next,  
210 through an antibody blocking assay, we assessed which integrin subunits are involved in  
211 Fn- and Vn-dependent entry of *C. difficile* spores into IECs. Results demonstrate that  
212 blocking the subunits of the collectin-binding,  $\alpha_2\beta_1$  integrin<sup>26,27</sup> and  $\beta_3$  integrin subunit did  
213 not affect internalization nor adherence of *C. difficile* spores to Caco-2 cells in the presence  
214 of Fn (Fig. 4e, f) or Vn (Fig. 4g, h). However, a significant decrease in spore-entry, but not  
215 spore-adherence, to differentiated and undifferentiated Caco-2 cells was observed upon  
216 blocking each subunit of  $\alpha_5\beta_1$  integrin in the presence of Fn (Fig. 4e, f, Extended Data Fig.  
217 11e, f), as well as blocking each subunit of  $\alpha_v\beta_1$  integrin in the presence of Vn (Fig. 4g, h,  
218 Extended Data Fig. 11g, h). These results were confirmed upon expressing each integrin  
219 subunit in Chinese hamster ovary (CHO) cells (Fig. 4i-k), a naïve cell line that otherwise  
220 does not express integrins. CHO cells expressing individual  $\alpha_5$  or  $\beta_1$  integrin subunits  
221 exhibited significant spore-entry but not adherence in the presence of Fn (Fig. 4l, m);  
222 equally, CHO cells expressing individual  $\alpha_v$  or  $\beta_1$  integrin subunit exhibited significant  
223 spore-entry but not spore-adherence in the presence of Vn (Fig. 4n, o). No increase in entry  
224 or adherence was detected in the absence of Fn and Vn (Extended Data Fig. 12 a, b).  
225 Altogether, these observations demonstrate that the internalization of *C. difficile* spores into  
226 IECs occurs through Fn- $\alpha_5\beta_1$ - and Vn- $\alpha_v\beta_1$  uptake pathways.  
227

228 **Fn and Vn bind to the hair-like extensions of *C. difficile* spores, formed by the**  
229 **collagen-like BclA3 exosporium protein.** *C. difficile* spores of epidemically relevant  
230 strains exhibit hair-like projections that are likely to be formed by the collagen-like  
231 exosporium proteins<sup>1,13</sup>. Fn and Vn have a gelatin/collagen-binding domain<sup>16,17</sup>, suggesting  
232 that these molecules might interact with *C. difficile* spores through these hair-like  
233 projections. Indeed, through TEM coupled with immunogold labeling of Fn and Vn, we  
234 observed that more than ~50% of the spores were positive for Fn- or Vn-immunogold  
235 particles ([Extended Data Fig. 13a, b](#)); immunogold Fn- and Vn-specific particles were  
236 observed in proximity to the hair-like extensions of *C. difficile* R20291 spores ([Fig. 5a, b](#)),  
237 suggesting that these structures might be implicated in spore-entry into IECs. Most  
238 epidemically relevant strains encode two collagen-like exosporium proteins, BclA2, and  
239 BclA3<sup>1,13</sup>. During the sporulation of R20291 strain, *bclA3* expression levels are ~60-fold  
240 higher than those of *bclA2*<sup>28</sup>. Consequently, we first hypothesized whether BclA3 was  
241 responsible for the formation of the hair-like extensions. Therefore, we constructed a single  
242 *bclA3* mutant strain, in an epidemic R20291 background, by removing the entire gene  
243 through a *pyrE*-based allelic exchange system<sup>29</sup> ([Extended Data Fig. 14](#)). Electron  
244 micrographs demonstrate that, as expected, wild-type R20291 ( $\Delta pyrE/pyrE^+$ ) spores  
245 exhibited typical hair-like projections observed in previous reports<sup>1,11,12</sup> ([Fig. 5c](#)). By  
246 contrast, the  $\Delta bclA3$  deletion mutant formed spores that lacked the hair-like projections  
247 ([Fig. 5d](#)) that were restored upon complementation of the  $\Delta bclA3$  mutant strain with a  
248 single wild-type copy of *bclA3* in the *pyrE* locus ( $\Delta bclA3/bclA3^+$ ; [Fig. 5e](#)), indicating that  
249 BclA3 is required for the formation of these projections on the surface of *C. difficile* spores.  
250

251 **BclA3 is required for Fn- $\alpha_5\beta_1$ - and Vn- $\alpha_v\beta_1$ -mediated spore-entry into IECs.** To  
252 address whether BclA3 exosporium protein is implicated in *C. difficile* spore-entry into  
253 IECs, we first assayed whether the absence of BclA3 protein affected the internalization of  
254 *C. difficile* spores into IECs in the presence of Fn or Vn. As a control, we ensured that the  
255 anti-*C. difficile* spore goat serum used to quantify extracellular *C. difficile* spores,  
256 recognized  $\Delta bclA3$  mutant spores ([Extended Data Fig. 15a–c](#)). Spores of the *C. difficile*  
257  $\Delta bclA3$  mutant strain exhibited a significant decrease in spore-entry into Caco-2 cells, but  
258 not adherence, to monolayers of Caco-2 cells was observed upon infection with *C. difficile*  
259 spores  $\Delta bclA3$  mutant in the presence of Fn ([Fig. 5f, g](#)) and Vn ([Fig. 5h, i](#)). Importantly, the  
260 defect in spore-entry of the  $\Delta bclA3$  mutant strain in the presence of Fn or Vn was restored  
261 to wild-type levels of internalization  $\Delta bclA3/bclA3^+$  strain ([Fig. 5f–i](#)), indicating that  
262 BclA3 is required for Fn- and Vn-mediated internalization into IECs. We further confirmed  
263 these results in monolayers of HeLa cells, evidencing essentially identical results ([Extended](#)  
264 [Data Fig. 16 a–d](#)). Next, to address whether Fn- $\alpha_5\beta_1$  and Vn- $\alpha_v\beta_1$ -mediated spore-entry is  
265 BclA3-specific, we carried out infection experiments with  $\Delta bclA3$  mutant spores in  
266 monolayers of CHO cells expressing individual integrin subunits. In the presence of Fn, a  
267 significant decrease in spore-entry ([Fig. 5j, k](#)), but not in adherence ([Extended Data Fig.](#)  
268 [16e, f](#)), was observed upon infection of CHO cells expressing the  $\alpha_5$  or  $\beta_1$  integrin subunit  
269 with  $\Delta bclA3$  mutant spores. Similarly,  $\Delta bclA3$  mutant spores internalized to a significantly  
270 lesser extent than wild-type spores during infection of CHO cells expressing  $\alpha_v$  or  $\beta_1$   
271 integrin receptors in the presence of Vn ([Fig. 5l, m](#)); however, the absence of BclA3 had no  
272 impact on spore-adherence to CHO cells in the presence of Vn ([Extended Data Fig. 16g, h](#)).  
273 Fn- and Vn-mediated internalization of *C. difficile* spores into CHO cells expressing each

274 integrin subunit was restored to wild-type levels upon infection with spores  $\Delta bclA3/bclA3^+$   
275 (Fig. 5j–m). Collectively, these results demonstrate that BclA3-Fn- $\alpha_5\beta_1$ - and BclA3-Vn-  
276  $\alpha_v\beta_1$  are two pathways through which *C. difficile* spores can internalize into non-phagocytic  
277 cells.

278

279 **Inactivation of the exosporium protein BclA3 decreases spore-adherence, but not**  
280 **spore-entry, of *C. difficile* spores to the intestinal mucosa.** To assess whether the  
281 collagen-like BclA3 exosporium protein also contributed to the internalization of *C.*  
282 *difficile* spores into the intestinal mucosa *in vivo*, we used a colonic and ileal loop mouse  
283 model (Fig. 6a-c, Extended data Fig. 17 a-c). In contrast to our *in vitro* data, analysis of  
284 colonic mucosa sections show that inactivation of *bclA3* leads to a significant decrease of  
285 ~60% in spore-adherence per  $10^5 \mu\text{m}^2$  to the ileum mucosa (Fig. 6d); however, no  
286 differences were observed in spore internalization relative to the total adhered-spores (Fig.  
287 6e). A similar trend was evidenced in ileal loops, where  $\Delta bclA3$  spores adhered in a ~50%  
288 lower than wild-type spores per  $10^5 \mu\text{m}^2$  (Fig. 6f); however, no differences were observed  
289 in spore internalization relative to total adhered-spores (Fig. 6g). The defects in spore-  
290 adherence to the colonic and ileum mucosa were restored to wild-type levels upon  
291 complementing the wild-type *bclA3* allele in the  $\Delta bclA3$  mutant (Fig. 6d–g, Extended data  
292 Fig. 17 a-c). Strikingly, these data indicate that the collagen-like BclA3 exosporium protein  
293 is required for *C. difficile* spore adherence to the intestinal mucosa, and that additional  
294 spore-surface proteins are contributing to redundant spore-entry pathways *in vivo*.

295

296 **The *C. difficile* collagen-like BclA3 exosporium protein contributes to spore-**  
297 **persistence and recurrence of the disease in mice.** Since BclA3 is essential for spore-  
298 entry into IECs *in vitro* and for adherence in the intestinal mucosa *in vivo*, we hypothesized  
299 that BclA3 might mediate spore-persistence and contribute to R-CDI. Therefore, antibiotic-  
300 treated mice were infected with spores of wild-type ( $\Delta pyrE/pyrE^+$ ),  $\Delta bclA3$  and  
301  $\Delta bclA3/bclA3^+$  strains (Fig. 6h). All three groups of mice exhibited similar weight loss  
302 during the initiation of CDI, and all manifested signs of diarrhea within 3 days post-  
303 infection (Extended Data Fig. 17d, e). Similar levels of *C. difficile* spores shed in feces  
304 were observed during the initiation of CDI between mice infected with wild-type  
305 ( $\Delta pyrE/pyrE^+$ ), and the mutants  $\Delta bclA3$  and  $\Delta bclA3/bclA3^+$  (Extended Data Fig. 17f).  
306 These results indicate that the absence of BclA3 does not affect the initiation of CDI. Next,  
307 the impact of BclA3 in the recurrence of the infection was assessed by treating *C. difficile*  
308 infected mice with vancomycin for 5 days (Fig. 6h), R-CDI was monitored from day 8  
309 post-infection. No significant differences in weight loss were evidenced after vancomycin  
310 treatment (days 8-11; Fig. 6i). However, a significant delay in the onset of diarrhea during  
311 R-CDI was observed after vancomycin treatment in mice infected with  $\Delta bclA3$  mutant  
312 spores compared to wild-type infected-mice (Fig. 6j). The defect in R-CDI observed in  
313  $\Delta bclA3$  mutant infected-mice was restored to wild-type levels with the complemented  
314  $\Delta bclA3/bclA3^+$  strain (Fig. 6j). Although there were no significant differences in the levels  
315 of *C. difficile* spores, shed in the feces during R-CDI (Extended Data Fig. 17f),  
316 significantly lower CFUs of  $\Delta bclA3$  mutant spores were detected in the medium colon  
317 compared to wild-type spores (Fig. 6k) but not in other sections of the intestinal tract  
318 (Extended Data Fig. 17g-i). Again, this defect was reverted in the complemented

319  $\Delta bclA3/bclA3+$  strain (Fig. 6k). Cytotoxicity levels in the cecum content of  $\Delta bclA3$  mutant-  
320 infected mice were similar to those found in animals infected with wild-type strain  
321 (Extended Data Fig. 17j). Collectively, these results demonstrate that the collagen-like  
322 BclA3 exosporium protein is involved in *C. difficile* persistence and recurrence of the  
323 disease.

324

325 **Inhibition of spore-entry into IECs renders *C. difficile* spores susceptible to**  
326 **taurocholate-germination.** Since *C. difficile* spore-entry into IECs requires integrin  
327 receptors, we tested whether cholesterol-lipid rafts, commonly required by integrin  
328 receptors for endocytosis<sup>30,31</sup>, were also required for uptake of *C. difficile* by IECs.  
329 Therefore, we used the cholesterol-chelating agent, nystatin, which is a caveolin-related  
330 pathway inhibitor that disrupts membrane microdomains known to be implicated in  
331 integrin-mediated endocytosis and pathogen uptake<sup>30,32</sup>. Cells were preincubated with  
332 nystatin for 1 h at 37 °C and infected in the same medium containing the inhibitor and *C.*  
333 *difficile* spores. *C. difficile* spore-entry was inhibited in a dose-dependent manner into  
334 Caco-2 cells and T84 cells (Fig 7a, b, Extended Data Fig. 18a, b). 30µM of nystatin  
335 inhibited the spore-entry by about 80% in human cell lines Caco-2 and about 65% in T84  
336 cells. We determined cell viability in the presence of nystatin by MTT at the highest  
337 concentration of the inhibitor. Cell viability was generally around 90% (Extended Data Fig.  
338 18c). These results suggest that *C. difficile* spore-entry is sensitive to cholesterol-  
339 sequestering compounds.

340 Vancomycin administration leads to increased fecal-concentration of primary bile  
341 acids<sup>33</sup> leading to enhanced *C. difficile* spore germination<sup>34,35</sup>, suggesting that luminal



342 taurocholate would trigger germination of extracellular *C. difficile* spores that could  
343 subsequent become inactivated by vancomycin. Therefore, we hypothesize that intracellular  
344 spores should remain dormant in the presence of taurocholate. To test this hypothesis,  
345 monolayers of 1-h nystatin-treated or untreated Caco-2 cells were infected for 3h with  
346 serum-treated *C. difficile* spores. Next, infected monolayers were washed and treated with  
347 taurocholate to trigger germination of extracellular spores, followed by ethanol-treatment to  
348 inactivate germinated *C. difficile* spores. We observed that not all of the spores became  
349 ethanol-sensitive upon taurocholate-treatment of infected Caco-2 monolayers (Fig. 7c),  
350 suggesting that internalized spores were protected from taurocholate-triggered germination.  
351 We confirmed this by evidencing a significant increase in ethanol-sensitive germinated  
352 spores in the presence of nystatin (Fig. 7c). These results indicate that blocking *C. difficile*  
353 spore-entry contributes to taurocholate-triggered germination of *C. difficile* spores and  
354 subsequent spore-inactivation.

355

356 **Inhibition of *C. difficile* spore-entry into the intestinal barrier reduces recurrence of**  
357 **the disease in mice.** To address whether *in vivo* *C. difficile* spore-entry into the intestinal  
358 barrier also required RGD-binding integrins<sup>36</sup>, colonic and ileal loop assays were assessed  
359 in the presence of RGD during *C. difficile* spore infection (Fig. 7d, e, Extended data Fig  
360 18d, e). Ileal and colonic loops were injected with RGD peptide and *C. difficile* spores  
361 during 5h, then were processed and visualized in confocal microscopy. Consistent with our  
362 *in vitro* data, in the colonic loop sections, we observed that presence of RGD peptide  
363 reduced spore internalization by ~82% (Fig. 7g), while no difference in spore-adherence  
364 was observed (Fig. 7h); similarly, in ileal loop sections, we observed that RGD peptide  
365 decreased spore internalization by ~90% (Fig. 7i) and does not affect the spore adherence

366 to the ileum mucosa (Fig. 7j). These results demonstrate that *C. difficile* spore-entry *in vivo*  
367 is RGD-binding integrin-dependent.

368 Since the RGD-dependency of spore-entry into the intestinal barrier is likely  
369 attributed to integrin receptors, we address whether the cholesterol-sequestering drug,  
370 nystatin, could block internalization of *C. difficile* spores into the intestinal barrier *in vivo* in  
371 the colonic and ileum mouse mucosa. Mice were treated for 24-h with nystatin or saline as  
372 a control prior to surgery and during intestinal loop-infection (Fig. 7d, f, Extended data Fig  
373 18d, f) then were infected with *C. difficile* spores for 5h, then tissues were processed for  
374 confocal microscopy. In the colonic loop section, we observed that nystatin had no effect  
375 on spore internalization (Fig. 7g) and in spore-adherence to the colonic mucosa (Fig. 7h);  
376 however, in the ileal loop sections, the presence of nystatin significantly decreased spore  
377 internalization by ~96% (Fig. 7i), and no effect in *C. difficile* spore-adherence to the ileum  
378 mucosa was observed (Fig. 7j).

379 Since *C. difficile* spore-entry prevents taurocholate-germination, contributing to the  
380 persistence of *C. difficile* spores during the disease; we hypothesized that administration of  
381 the inhibitor of spore-entry, nystatin, during CDI-treatment with vancomycin, could reduce  
382 the recurrence of the infection in a previously developed mouse model of R-CDI<sup>8</sup> (Fig. 7k).  
383 To address this question, antibiotic-treated mice were infected with *C. difficile* R20291  
384 spores. During the first episode of CDI, both groups of mice had similar levels of weight  
385 loss, the timing of the onset of diarrhea and shed similar amounts of *C. difficile* spores  
386 during the initiation of CDI (days 1-3) (Extended Data Fig. 18g-i). At day 3 post-infection,  
387 animals were treated with vancomycin or a mixture of vancomycin and nystatin for 5 days  
388 (Fig. 7k). Vancomycin-treated mice exhibited a significant decrease in weight during R-  
389 CDI, which became highest at day 11 post-infection (4<sup>th</sup> day after vancomycin treatment;

390 [Fig. 7k, m](#)). By contrast, CDI-animals treated with vancomycin and nystatin had no  
391 significant decrease in weight loss during the recurrence of the infection ([Fig. 7k, n](#)). These  
392 observations were confirmed upon monitoring the onset of diarrhea during R-CDI ([Fig.](#)  
393 [7o](#)), where we observed a significant delay in the onset of recurrent diarrhea in CDI-mice  
394 treated with the mixture of vancomycin and nystatin compared to vancomycin alone ([Fig.](#)  
395 [7o](#)). The animals shed similar amounts of *C. difficile* spores during R-CDI ([Extended Data](#)  
396 [Fig. 18i](#)). Collectively, these results demonstrate that the administration of a  
397 pharmacological inhibitor of internalization of *C. difficile* spores during vancomycin  
398 treatment delays the incidence of recurrence of the infection.

399

## 400 **Discussion**

401 During CDI, *C. difficile* spore-formation is essential in the recurrence of the  
402 disease<sup>7</sup>, yet the underlying mechanisms that correlate *C. difficile* spore-persistence and  
403 recurrence of the disease remain unclear. In this study, we unravel a novel and unexpected  
404 mechanism employed by *C. difficile* spores to interact with the intestinal mucosa that  
405 contributes to the recurrence of disease. Our results have identified host molecules, cellular  
406 receptors, and a spore-surface ligand involved in spore-entry into IECs. Importantly,  
407 intracellular spores remain dormant in the presence of germinant. Using nystatin, a  
408 pharmacological inhibitor of spore-entry in combination with antibiotic treatment, leads to  
409 a reduction in the recurrence of the disease in mice. Together, these observations open a  
410 new angle for therapeutic interventions of CDI to prevent the recurrence of the disease.

411 Our results identified host molecules and cellular receptors involved in the entry of  
412 *C. difficile* spores into IECs. The presence of Fn or Vn allows *C. difficile* spores to gain  
413 intracellular access to IECs, in an RGD-specific manner, and through specific integrin

414 receptors (i.e.,  $\alpha_5\beta_1$  and  $\alpha_v\beta_1$ ). These observations were confirmed by the *in vivo* inhibition  
415 of *C. difficile* spore-entry in the presence of the RGD peptide, which specifically inhibits  
416 interactions between Fn- $\alpha_5\beta_1$  and Vn- $\alpha_v\beta_1$ <sup>20,21</sup>. Although Fn and Vn are mainly located in  
417 the basal and basolateral membrane of IECs contributing to cell polarity<sup>16,17</sup>, antibody  
418 staining of healthy ileum and colonic tissue demonstrate that Fn and Vn are lumenally  
419 accessible in a significant fraction of the IECs. Most of these cells were positive for  
420 lumenally accessible Ecad, and suggests that these cell types include cell-extrusion, cells  
421 next to extrusion sites, and epithelial folds that typically undergo adherent junction  
422 reorganization<sup>22-24</sup>. However, a small fraction of cells positive for lumenally accessible Fn  
423 and Vn were negative for lumenally accessible Ecad, suggesting a novel phenotype within  
424 cells at the intestinal epithelial barrier. We also confirmed previous observations in mice  
425 that identified GCs have lumenally accessible Ecad<sup>22</sup>, suggesting that these cell types might  
426 also be targeted by *C. difficile* spores to gain entry into the epithelial barrier. M cells are an  
427 additional cell-type that might contribute to *C. difficile* spore-entry into the intestinal  
428 epithelial barrier includes since they expresses  $\beta_1$ -integrin at the apical surface in contrast  
429 to its normal basolateral location in enterocytes<sup>22,37,38</sup>. The fact that *in vivo* spore entry was  
430 RGD-binding integrin-specific, suggests that Fn and Vn are accessible and employed by *C.*  
431 *difficile* spores to gain entry into IECs, which is consistent with the presence of accessible  
432 Fn and Vn in ileal and colonic loops. It is noteworthy that while RGD-specific entry was  
433 observed in both ileal and colonic loops, nystatin was only able to reduce spore-entry into  
434 the ileum, but not colonic mucosa. This suggests that caveolae-independent endocytosis of  
435 *C. difficile* spores might prime in the colonic epithelia. During CDI, *C. difficile* toxins  
436 disrupt adherent junctions, leading to progressive exposure of deep regions of the colonic

437 epithelium as infection advances. One consequence of this cellular disorganization may be  
438 an alteration to the distribution of cell receptors that may lead to increased adherence and  
439 internalization of *C. difficile* spores into the intestinal mucosa. Together, these observations  
440 prompt further studies to address how epithelium remodeling contributes to persistence of  
441 *C. difficile* spores and recurrence of the disease.

442 Another major contribution of this work is the role of the spore surface collagen-like  
443 BclA3 exosporium protein in *C. difficile* spore-entry into IECs in a Fn- $\alpha_5\beta_1$ - and Vn- $\alpha_v\beta_1$ -  
444 dependent manner. Our previous work shows that Fn and Vn bind in a dose-dependent  
445 manner to *C. difficile* spores<sup>15</sup>. By immunogold-electron microscopy, our results  
446 demonstrate that Fn and Vn bind to the hair-like projections of *C. difficile* spores. We also  
447 demonstrate that they are formed by the collagen-like exosporium glycoprotein BclA3. It is  
448 noteworthy that experiments with monolayers of Caco-2 cells and CHO cells expressing  
449 integrin subunits demonstrate that BclA3 is essential for spore-entry in the presence of Fn  
450 and Vn in a integrin-dependent manner; results that contrast with BclA3 being essential for  
451 adherence to the intestinal mucosa, but not for spore-entry into the intestinal barrier.  
452 Coupling these results with those of *in vivo* RGD-specific *C. difficile* spore-entry into the  
453 intestinal barrier, indicates that additional spore-surface proteins might play redundant roles  
454 during *in vivo* spore-entry. Regardless of these incongruencies, we observed that BclA3  
455 contributes to the recurrence of the disease in a mouse model, suggesting that BclA3-  
456 mediated spore-adherence to the intestinal mucosa might contribute to spore persistence  
457 and recurrence of the disease. The differences in spore-adherence to the colonic tissue after  
458 R-CDI observed in the medium colonic tissue of mice might relate to the absence of  
459 mucosal folds typically observed in the distal and proximal colon of mice<sup>39</sup>. Here, we have

460 shown that BclA3 uses Fn and Vn and their specific integrins to gain-entry into IECs and  
461 that BclA3 is essential for *C. difficile* spore adherence to the intestinal mucosa and  
462 contributes to the recurrence of the disease.

463 The work presented here also shows that *C. difficile* spore-entry into IECs  
464 contributes to spore dormancy in the presence of primary bile salts (i.e., taurocholate), and  
465 that blocking *in vivo* spore-entry during antibiotic treatment (vancomycin), leads to reduced  
466 recurrence of CDI in mice. This brings a broader understanding of how strict anaerobic  
467 spore-formers can persist in the host and remain dormant in a dysbiosis environment  
468 enriched with bile acids that trigger spore germination. Intracellular bacterial spores may  
469 survive until released back to the luminal environment to recolonize the host. Although the  
470 precise mechanism of how intracellular spores would contribute to the recurrence of the  
471 disease is unclear and prompts further studies, it may involve the rapid renewal of the  
472 intestinal epithelium, which, due to rapid proliferation and differentiation of multipotential  
473 stem cells located in the crypts of Lieberkühn<sup>40-43</sup>, renew the epithelial barrier every 5 days.  
474 The factors that contribute to infection recurrence, although partly linked to continued  
475 disruption of the microbiota<sup>44</sup>, are also directly linked to the persistence of *C. difficile*  
476 spores in the host. This is particularly relevant for CDI, considering that the rates for  
477 recurrent CDI are around ~18 to 32%, and may rise between 45 and 65% during subsequent  
478 recurrent episodes<sup>2,44</sup>. Importantly, this *C. difficile* spore-entry phenotype provides an  
479 additional point of intervention of disease recurrence and therapeutic susceptibility. The  
480 cholesterol-sequestering drug, nystatin, is FDA approved for oral administration<sup>45</sup>, raising  
481 new approaches to develop pharmacological formulations that target *C. difficile* spore-entry

482 during disease. Similarly, BclA3 and  $\alpha_5\beta_1$  and  $\alpha_v\beta_1$  integrins are also candidates drug  
483 targets to combat recurrent *C. difficile* infections.

484

485 **Methods.**

486 **Data reporting.** No statistical methods were used to predetermine the sample size. The  
487 experiments were not randomized, and investigators were not blinded to allocation during  
488 experiments and outcome assessment.

489

490 **Bacterial strains and growth conditions.** *C. difficile* strains (See Table S1) were  
491 routinely grown at 37 °C under anaerobic conditions in a Bactron III-2 anaerobic chamber  
492 (Shellab, USA) in BHIS medium: 3.7% weight vol<sup>-1</sup> brain heart infusion broth (BD, USA)  
493 supplemented with 0.5% weight vol<sup>-1</sup> yeast extract (BD, USA) and 0.1% weight vol<sup>-1</sup> L-  
494 cysteine (Merck, USA) or on BHIS agar plates. *E. coli* strains were routinely grown  
495 aerobically at 37 °C under aerobic conditions with shaking (200 r.p.m.) in Luria-Bertani  
496 (LB) medium (BD, USA), supplemented with 25 µg mL<sup>-1</sup> chloramphenicol (Merck, USA),  
497 where appropriate.

498 For mutant construction, a defined *C. difficile* minimal medium (CDMM) media  
499 was prepared as described by Cartman and Minton<sup>46</sup> as an uracil-free medium when  
500 performing genetic selections. For CDMM broth preparation, 5× amino acids (50 mg mL<sup>-1</sup>  
501 casamino acids, 2.5 mg mL<sup>-1</sup> L-tryptophan, 2.5 mg mL<sup>-1</sup> L-cysteine), 10× salts (50 mg  
502 mL<sup>-1</sup> Na<sub>2</sub>HPO<sub>4</sub>, 50 mg mL<sup>-1</sup> NaHCO<sub>3</sub>, 9 mg mL<sup>-1</sup> KH<sub>2</sub>PO<sub>4</sub>, 9 mg mL<sup>-1</sup> NaCl), 20× glucose  
503 (200 mg mL<sup>-1</sup> D-glucose), 50× trace salts ( 2.0 mg mL<sup>-1</sup> (NH<sub>4</sub>)<sub>2</sub>SO<sub>4</sub>, 1.3 mg mL<sup>-1</sup>  
504 CaCl<sub>2</sub>·2H<sub>2</sub>O, 1.0 mg mL<sup>-1</sup> MgCl<sub>2</sub>·6H<sub>2</sub>O, 0.5 mg mL<sup>-1</sup> MnCl<sub>2</sub>·4H<sub>2</sub>O, 0.05 mg mL<sup>-1</sup>  
505 CoCl<sub>2</sub>·6H<sub>2</sub>O), 100× iron (0.4 mg mL<sup>-1</sup> FeSO<sub>4</sub>·7H<sub>2</sub>O) and 100× vitamins (0.1 mg mL<sup>-1</sup> D-  
506 biotin 0.1, mg mL<sup>-1</sup> calcium-D-pantothenate, 0.1 mg mL<sup>-1</sup> pyridoxine) stock solutions were  
507 made by dissolving their components in Milli-Q water and filter sterilizing (0.2-µm pore



508 size) prior to use. Solutions were mixed to obtain a final CDMM media made of 10 mg  
509 mL<sup>-1</sup> casamino acids, 0.5 mg mL<sup>-1</sup> L-tryptophan, 0.5 mg mL<sup>-1</sup> L-cysteine, 5 mg mL<sup>-1</sup>  
510 Na<sub>2</sub>HPO<sub>4</sub>, 5 mg mL<sup>-1</sup> NaHCO<sub>3</sub>, 0.9 mg mL<sup>-1</sup> KH<sub>2</sub>PO<sub>4</sub>, 0.9 mg mL<sup>-1</sup> NaCl, 10 mg mL<sup>-1</sup> D-  
511 glucose, 0.04 mg mL<sup>-1</sup> (NH<sub>4</sub>)<sub>2</sub>SO<sub>4</sub>, 0.026 mg mL<sup>-1</sup> CaCl<sub>2</sub>·2H<sub>2</sub>O, 0.02 mg mL<sup>-1</sup>  
512 MgCl<sub>2</sub>·6H<sub>2</sub>O, 0.01 mg mL<sup>-1</sup> MnCl<sub>2</sub>·4H<sub>2</sub>O, 0.001 mg mL<sup>-1</sup> CoCl<sub>2</sub>·6H<sub>2</sub>O, 0.004 mg mL<sup>-1</sup>  
513 FeSO<sub>4</sub>·7H<sub>2</sub>O, 0.001 mg mL<sup>-1</sup> D-biotin, 0.001 mg mL<sup>-1</sup> calcium-D-pantothenate and 0.001  
514 mg mL<sup>-1</sup> pyridoxine<sup>46</sup>. For solid medium, agar (BD, USA) were mixed with CDMM to a  
515 final concentration of 1.0% weight vol<sup>-1</sup>. Finally, media were supplemented with uracil  
516 (Sigma–Aldrich, USA) at 5 mg mL<sup>-1</sup> and 5-Fluoroorotic acid (5-FOA) (USBiological  
517 USA) at 2 mg mL<sup>-1</sup> as described<sup>47,48</sup>.

518

519 **Cell Lines and Reagents.** Caco-2, Vero, HT29, and Chinese hamster ovary (CHO) were  
520 obtained from ATCC (USA). Dr. Mauricio Farfán (Universidad de Chile, Chile) gently  
521 provided T84 cells. Caco-2 and Vero were routinely grown at 37 °C with 5% of CO<sub>2</sub> with  
522 Dulbecco's modified Eagle's minimal essential medium (DMEM) High Glucose (HyClone,  
523 USA); CHO cells in Ham's F-12K (Kaighn's) medium; T84 in DMEM/F12 1:1 (HyClone,  
524 USA); and HT29 in RPMI 1640. All media were supplemented with 10% vol vol<sup>-1</sup>  
525 inactivated Fetal Bovine Serum (FBS) (HyClone, USA) and 100 U ml<sup>-1</sup> penicillin, and 100  
526 µg ml<sup>-1</sup> streptomycin (HyClone, USA). T84 cells were cultured onto Transwell (Corning  
527 USA) until 1,000–2,000 Ω. For transfected CHO cells (CHO-α<sub>v</sub>, CHO-α<sub>5</sub>, and, CHO-β<sub>1</sub>),  
528 the culture media was supplemented with 1,500 µg mL<sup>-1</sup> geneticin (HyClone USA). For  
529 immunofluorescence experiments, cells were plated over glass coverslip in a 24-wells plate  
530 and cultured for 2-days post confluence (undifferentiated) or 8-days post-confluence  
531 (differentiated), changing the culture medium every other day.

532

533 **Spore Preparation.** Spores preparation was done as previously has been published<sup>18</sup>.

534 Briefly, 100  $\mu$ L of 1:1,000 dilution of an overnight culture in BHIS was plated in 70:30

535 agar plates that were prepared as follow: 6.3% weight vol<sup>-1</sup> (BD, USA), 0.35% weight

536 vol<sup>-1</sup> protease peptone (BD, USA), 0.07% ammonium sulfate (NH<sub>4</sub>)<sub>2</sub>SO<sub>4</sub> (Merck USA),

537 0.106% weight vol<sup>-1</sup> Tris base (Omnipur, Germany), 1.11% weight vol<sup>-1</sup> brain heart

538 infusion extract (BD, USA) and 0.15% weight vol<sup>-1</sup> yeast extract (BD, USA), 1.5% weight

539 vol<sup>-1</sup> Bacto agar (BD, USA). Plates were incubated for 7 days at 37 °C under anaerobic

540 conditions in anaerobic chamber Bactron III-2 (Shellab USA). Then plates were removed

541 from the chamber, and colonies were scraped out with ice-cold sterile Milli-Q water. Then

542 the sporulated culture was washed five times with ice-cold Milli-Q water in micro-

543 centrifuge at 18,400 $\times$ g for 5 min each. To separate spores, the sporulated culture was

544 loaded in 45% weight vol<sup>-1</sup> autoclaved Nycodenz (Axell USA) solution and centrifugated

545 at 18,400 $\times$ g for 40 min. Spore pellet was separated and washed 5 times at 18,400 $\times$ g for 5

546 min with ice-cold sterile Milli-Q water to remove Nycodenz. Spores were counted in

547 Neubauer chamber, and volume adjusts at 5  $\times$  10<sup>9</sup> spores mL<sup>-1</sup> and stored at -80 °C.

548

549 ***C. difficile* mutant construction by allelic exchange.** Primer design and amplification of

550 *C. difficile* R20291 strain were based on the available *C. difficile* genomes from the

551 EMBL/GenBank databases with accession number FN545816. The oligonucleotides and

552 the plasmids/strains used in this study are listed in Table S1 and Table S2, respectively. In-

553 frame deletions in *C. difficile* R20291 were made by allelic exchange using *pyrE* alleles<sup>47</sup>.

554 To remove the *bclA3* gene, a 1086 bp allelic exchange cassette was obtained by  
555 overlap extension PCR of the LHA and RHA originated by amplification with primer pairs  
556 P332 (FP-LHA-bclA3-pyrE)/P334 (RP-LHA-bclA3-pyrE) and P335 (FP-RHA-bclA3-  
557 pyrE)/P336 (RP-RHA-bclA3-pyrE), each of 544 bp and 542 bp in size. The resulting  
558 cassette yielded complete removal of the entire *bclA3* cassette. Next, this cassette was  
559 cloned into Sbf1/AscI sites in pMTL-YN4, giving plasmid pDP376. To verify the correct  
560 construction of the plasmids, all constructs were Sanger sequenced.

561 The plasmids obtained were transformed into *E. coli* CA434 (RP4) and mated with  
562 *C. difficile* R20291  $\Delta$ *pyrE*<sup>47</sup>. *C. difficile* transconjugants were selected by sub-culturing on  
563 BHIS agar containing 15  $\mu$ g mL<sup>-1</sup> thiamphenicol (Sigma–Aldrich USA) and 25  $\mu$ g mL<sup>-1</sup>  
564 cefoxitin (Sigma–Aldrich USA) and re-streaked five times. The single-crossover mutants  
565 identified were streaked onto *C. difficile* minimal medium (CDMM)<sup>49</sup> with 1.5% weight  
566 vol<sup>-1</sup> agar supplemented with 2 mg mL<sup>-1</sup> 5-Fluoroorotic acid (USBiological, USA) and 5  
567  $\mu$ g mL<sup>-1</sup> uracil (Sigma–Aldrich USA) in order to select for plasmid excision. Confirmation  
568 of plasmid excision was made by negative selection in BHIS-thiamphenicol plates. The  
569 isolated FOA-resistant and thiamphenicol resistant colonies were screened using the primer  
570 pair P664 (FP-bclA3-detect) / P665 (RP-bclA3-detect) for the *bclA3* mutant. All mutants  
571 were whole-genome sequenced to confirm the genetic background and that no additional  
572 SNPs were introduced during the genetic manipulation. For correction of the *pyrE*  
573 mutation, transconjugants with pMTL-YN2C were streaked onto minimal media without  
574 uracil or FOA supplementation, and developed colonies were analyzed further.

575

576 **Complementation by allelic exchange at the *pyrE* locus.** To complement the  $\Delta$ *bclA3*  
577 mutation, a 3,564 bp fragment containing 372 bp upstream of the start codon of *bclA3* and

578 the entire bicistronic operon formed by *sgtA* and *bclA3* was PCR amplified with primer  
579 pairs P476 (NFP-*bclA3c*-promotor)/P477 (NRP-*bclA3c*) and cloned into BamHI/EcoRI  
580 sites of pMTL-YN2C, giving plasmid pMPG1. Next, plasmid pMPG1 was transformed into  
581 *E. coli* CA434 and subsequently conjugated with *C. difficile* R20291 $\Delta$ *pyrE*  $\Delta$ *bclA3*,  
582 respectively, as described above. The transconjugants obtained were streaked onto CDMM  
583 and tested by colony PCR using primer pair P530 (Fp-*pyrE* detect)/P529 (RP-*pyrE* detect)  
584 for *pyrE* reversion. Complemented strains were also subjected for whole-genome  
585 sequencing.

586

587 **Transfections of CHO cells with  $\alpha_5$ ,  $\alpha_v$  and,  $\beta_1$  integrins.** The integrins subunits were  
588 overexpressed in CHO cells line with the following plasmids: Alpha 5 integrin-GFP  
589 (Addgene plasmid# 15238)<sup>50</sup>, miniSOG-Alpha-V-Integrin-25 (Addgene plasmid # 57763)<sup>51</sup>  
590 and Beta1-GFP in pHcgreen donated by Martin Humphries (Addgene plasmid # 69804)<sup>52</sup>.  
591 CHO cells were seeded on coverslips in 24-well plates until reach 70-90% of confluency  
592 and were transfected using Lipofectamine® LTX (Invitrogen USA) according to  
593 manufacturer protocol with 1  $\mu$ g of each plasmid. Transfected cells were analyzed and  
594 confirmed by positive GFP fluorescence in epifluorescence microscopy. When the  
595 population GFP positive cells were higher than 50%, were selected for geneticin resistance  
596 with 1,500  $\mu$ g mL<sup>-1</sup> of geneticin until ~100% of GFP positive cells, and the level of  
597 expression of the integrin subunits in the cells was confirmed by Western blot.

598

599 **SDS-PAGE and Western blot of transfected CHO cells.** Transfected CHO cells were  
600 washed and homogenized with RIPA buffer that was prepared as follow: 50 mM buffer Tris  
601 HCl (Omnipur, Germany); 150 mM NaCl (Sigma–Aldrich, USA); 0.5% weight vol<sup>-1</sup>

602 deoxycholate (Sigma–Aldrich, USA); 1% vol vol<sup>-1</sup> NP 40 (Sigma–Aldrich, USA); 1 mM  
603 EGTA (Sigma–Aldrich, USA); 1 mM EDTA (Sigma–Aldrich); 0.1% weight vol<sup>-1</sup> SDS  
604 (Winkler, USA). The cell lysate was centrifuged at 18,400×g for 30 min at 4 °C, and  
605 protein concentration was quantified by BCA protein kit (RayBiotech USA). Next, 20 µg of  
606 protein were suspended in 2X SDS-PAGE sample loading buffer, boiled and  
607 electrophoresed on 12% vol vol<sup>-1</sup> and 4% vol vol<sup>-1</sup> acrylamide SDS-PAGE gels (Bio-Rad  
608 Laboratories, Canada) on MiniProtean® camera (Bio-Rad Laboratories, Canada). Then  
609 proteins were transferred to a nitrocellulose membrane (Bio-Rad Laboratories, Canada).  
610 Membranes were blocked then probed in Tris-Buffered saline containing 0.1% vol vol<sup>-1</sup>  
611 Tween (TTBS), with 2% weight vol<sup>-1</sup> BSA, incubated with mouse anti- $\alpha_v$ ,  $\alpha_5$  and  $\beta_1$   
612 antibody (SC166665, SC376156 y SC374429; Santa Cruz Biotechnologies, USA) and  
613 1:1,000 mouse anti-alpha tubulin (T5168 Sigma–Aldrich USA) in 2% BSA-TTBS as  
614 loading control at concentration and were washed 3 times with TTBS. Membranes were  
615 incubated with 1:10,000 vol vol<sup>-1</sup> secondary antibody anti-mouse horseradish peroxidase  
616 (HRP) conjugate (A5278, Sigma–Aldrich, USA) in 2% weight vol<sup>-1</sup> BSA-TTBS. HRP  
617 activity was detected with a chemiluminescence detection system (Fotodyne Imaging  
618 system, USA.) by using PicoMax sensitive chemiluminescence HRP substrate (Rockland  
619 Immunochemicals, USA.).

620

621 **Germination assay of extracellular *C. difficile* spores in Caco-2 cells.** Two–day old  
622 confluent monolayers of Caco-2 cells were treated with 30 µM of nystatin for 1 h at 37 °C  
623 or DMEM high glucose without FBS as control. To infect cells, *C. difficile* spores at an  
624 MOI of 10 were pre-incubated 1 h at 37 °C with 20 µL of NHS and then suspended in 200  
625 µL that were added to each well; FBS final concentration 10% vol vol<sup>-1</sup>.

626 To remove unbound spores, monolayers were washed 3 times with PBS, and cells  
627 were incubated with 0.1% weight vol<sup>-1</sup> sodium taurocholate (Sigma–Aldrich, USA) in  
628 DMEM for 1 h at 37 °C (or DMEM as control) and washed 3 times with PBS. Cells were  
629 treated with 100% ethanol for 10 min, and cells were lysed with PBS-0.06% Triton X-100  
630 for 10 min, plated in BHIS-CC supplemented with 0.1% weight vol<sup>-1</sup> sodium taurocholate  
631 and incubated at 37 °C overnight. The number of CFU mL<sup>-1</sup> was determined, and the  
632 percentage of adherence relative to the control.

633

634 **Infection of monolayers of cell lines with *C. difficile* spores.** Adherence and intracellular  
635 spores were examined using a differential immunofluorescence staining procedure, as  
636 previously described<sup>14,53</sup> with modifications. To evaluate the dynamic of *C. difficile* spore  
637 in Caco-2 cells and T84 cells. Caco-2 and T84 cells were grown on coverslips in 24–wells  
638 tissue culture plates until they reach a monolayer of 2-days post-confluency and were  
639 infected for 0.5, 1, 3, 5, and 8 h at 37 °C at an MOI of 10 of *C. difficile* spores pre-  
640 incubated 1h at 37 °C with 20µL of FBS and then suspended in the infection volume of  
641 200µL that was added to each well. Then were washed gently in PBS prior to  
642 immunostaining as described below.

643 To evaluate if *C. difficile* internalize in different cell lines, undifferentiated,  
644 differentiated Caco-2, T84, Vero and HT29 cells were infected at 37 °C with an MOI 10  
645 with *C. difficile* spore strain 630, and R20291 preincubated 1h at 37 °C with FBS or  
646 DMEM as control as was described above. Were washed gently in PBS prior to  
647 immunostaining, as described below.

648 Also, undifferentiated Caco-2 cells were infected at an MOI of 10 with *C. difficile*  
649 spores preincubated 1h at 37 °C with FBS, mouse serum (Pacific Immunology, USA), rat

650 serum (Pacific Immunology, USA), rabbit serum (Pacific Immunology, USA) and NHS  
651 (Complement Technology USA) as was described above. Then were washed gently in PBS  
652 prior to immunostaining, as described below.

653 To evaluate if *C. difficile* internalization occurs in different strains, undifferentiated  
654 Caco-2 cells were infected at an MOI of 10 with *C. difficile* spores R20291, M120 and  
655 spores of *C. difficile* clinical isolates PUC52, PUC30, PUC 25, PUC31, PUC 98 and PUC  
656 131<sup>54</sup>, which were pre-incubated 1h at 37 °C with FBS as was described above. Then were  
657 washed gently in PBS prior to immunostaining, as described below.

658 To assess that the internalization of *C. difficile* spores into IECs is through the  
659 specific interaction between Fn or Vn and their cognate integrin receptors, infection  
660 experiments were done in the presence of the RGD peptide<sup>20,21</sup>. Briefly, differentiated and  
661 undifferentiated Caco-2 cells were incubated with 0, 1, 3, and 5  $\mu\text{g mL}^{-1}$  of RGD peptide  
662 (Abcam USA) for 1 h, 37 °C then were infected for 3h at 37 °C with spores pre-incubated  
663 1h at 37 °C with NHS as was described above, then samples were washed gently in PBS  
664 prior to immunostaining as described below.

665 To evaluate whether the internalization of the spores is mediated by Fn and Vn,  
666 differentiated and undifferentiated Caco-2 cells were treated for 1h 37 °C at with 10  $\mu\text{g}$   
667  $\text{mL}^{-1}$  of purified human Fn or human Vn in DMEM and then were infected with an MOI 10  
668 of untreated *C. difficile* spores R20291. Also, the infection was performed using untreated  
669 Caco-2 cells that were infected for 3h at 37 °C with an MOI 10 of *C. difficile* spores pre-  
670 incubated for 1h at 37 °C with 10  $\mu\text{g mL}^{-1}$  of human Fn or human Vn in DMEM. Then  
671 samples were washed in PBS prior to the immunostaining as described below.

672 To confirm that the internalization of *C. difficile* spores is dependent of Fn and Vn,  
673 we perform an infection assay in differentiated and undifferentiated Caco-2 cells that were

674 pre-incubated with 1, 3, or 5  $\mu\text{g mL}^{-1}$  of RGD peptide and were infected with an MOI of 10  
675 with *C. difficile* spores pre-incubated for 1h 37 °C with 10  $\mu\text{g mL}^{-1}$  of purified human Fn  
676 or human Vn in DMEM. Then samples were washed in PBS prior to the immunostaining as  
677 described below.

678 To identify the integrin subunits implicated in spore-entry, an antibody blocking  
679 assay was performed using mouse monoclonal antibodies against individual integrin  
680 subunits: anti-human integrin  $\alpha_5$ ,  $\alpha_v$ , (ab78614, ab16821; Abcam, USA),  $\alpha_2$ ,  $\beta_1$  and  $\beta_3$   
681 (MAB1950Z, MAB1959Z, and MAB2023Z; Millipore USA); and control non-immune IgG  
682 antibody (I5006, Sigma–Aldrich, USA). Caco-2 cells were incubated with 200 $\mu\text{L}$  of  
683 DMEM with the appropriate antibodies at 5  $\mu\text{g mL}^{-1}$  for 1 h at 37 °C. The cells were  
684 infected for 3h at 37 °C with spores pre-incubated for 1h at 37 °C with 10  $\mu\text{g mL}^{-1}$  of  
685 purified human Fn or human Vn in DMEM. Then samples were washed in PBS prior to the  
686 immunostaining as described below.

687 In order to demonstrate that *C. difficile* spore entry requires the integrins subunits  
688  $\alpha_5$ ,  $\alpha_v$ , and  $\beta_1$ , Then CHO cells with ectopic expression of  $\alpha_5$ ,  $\alpha_v$  and,  $\beta_1$  integrins, were  
689 infected 3 h at 37 °C with an MOI of 10 of *C. difficile* spores that were preincubated with  
690 10  $\mu\text{g mL}^{-1}$  of purified human Fn or human Vn in DMEM. Then samples were washed in  
691 PBS prior to the immunostaining as described below.

692 To evaluate whether the collagen-like exosporium protein BclA3 is required for *C.*  
693 *difficile* spore entry into intestinal epithelial cells is dependent of differentiated Caco-2 cells  
694 and monolayers of HeLa cells, were infected for 3 h at 37 °C with an MOI of 10 with wild-  
695 type ( $\Delta\text{pyrE}/\text{pyrE}^+$ ),  $\Delta\text{bclA3}$  and  $\Delta\text{bclA3}/\text{bclA3}^+$  *C. difficile* R20291 spores that were  
696 preincubated for 1h at 37 °C with 10  $\mu\text{g mL}^{-1}$  of purified human Fn or human Vn in



697 DMEM. Then samples were washed in PBS prior to the immunostaining as described  
698 below.

699 To evaluate the effect of nystatin in the internalization of *C. difficile* spores, Caco-2  
700 cells were pre-incubated with 6, 12, 18, 24, and 30  $\mu$ M nystatin or T84 cells were incubated  
701 with 30 $\mu$ M of nystatin (Sigma–Aldrich USA) for 1 h at 37 °C in DMEM and in the same  
702 media were infected for 3 h at 37 °C with spores at an MOI 10 pre-incubated with FBS as  
703 was described above. At the used concentration of nystatin, the cell viability of treated  
704 Caco-2 cells and T84 for 4 h was ~90%, as was observed by trypan blue (Invitrogen USA)  
705 and MTT assay (Life Technologies USA) according to manufacturer protocols.

706

707 **Immunofluorescence of adhered *C. difficile* spores in infected monolayers and**  
708 **epifluorescence analysis.** The aforementioned infected monolayers of cells were  
709 subsequently fixed with PBS–4% paraformaldehyde for 10 min, then were washed 3 times  
710 and blocked with PBS–1% BSA overnight at 4 °C; in nonpermeabilized monolayers, the  
711 extracellular spores were marked with 1:50 anti-*C. difficile* spore goat serum (recognize  
712 specifically to *C. difficile* spores in infections of IECs infection assays) in PBS–1% BSA 1  
713 h RT and 1:400 anti-goat conjugated with CFL 488 secondary antibody (green) (SC362255,  
714 Santa Cruz Biotechnologies, USA) in PBS–1% BSA for 1 h RT. The samples were washed  
715 three times with PBS and once with sterile distilled water. Samples were then dried at RT  
716 for 30 min, and coverslips were mounted using Dako Fluorescence Mounting Medium  
717 (Dako, Denmark) and sealed with nail polish. Samples were observed on an Olympus  
718 BX53 fluorescence microscope with UPLFLN 100 $\times$  oil objective (numerical aperture  
719 1.30). Images were captured with the microscope camera for fluorescence imaging

720 Qimaging R6 Retiga and pictures were analyzed with ImageJ (NIH, USA). Extracellular  
721 spores or adhered were considerate as spores in phase contrast that were marked in  
722 fluorescence. Internalized spores were considered as spores visible in phase contrast, but  
723 that does not have fluorescence. A total of ~300 spores were analyzed per experimental  
724 condition.

725

726 **Mice used.** 6-8 weeks C57BL/6 (male or female) were obtained from the breeding colony  
727 at the Biological Science Department of Andrés Bello University derived from Jackson  
728 Laboratories. Mice were housed with ad libitum access to food and water. Bedding and  
729 cages were autoclaved, and mice had a 12-hour cycle of light and darkness. All procedures  
730 were performed following the approved protocols by the Institutional Animal Care and Use  
731 Committee of the Universidad Andrés Bello.

732

733 **Colonic and ileal loop assay.** C57BL/6 mice were anesthetized in an isoflurane chamber  
734 (RWD USA) with 4% vol vol<sup>-1</sup> isoflurane (Baxter USA) at and were maintained with 2%  
735 vol vol<sup>-1</sup> during the surgery administrated by air. The intestinal loop model was performed  
736 as previously described<sup>18</sup>. Briefly, a midline laparotomy was performed, making 1-cm  
737 incision in the abdomen, 1.5 cm ileal, and proximal colon (at 1.0 – 1.5 cm from the cecum  
738 as a reference) were ligated with silk surgical suture. To evaluate the effect of NYS or RGD  
739 peptide in *C. difficile* spore internalization, mice were treated with 17,000 UI kg<sup>-1</sup> NYS (*n*  
740 = 4) 24h before the surgery. In the loop, as control, mice were treated with 0.9% NaCl  
741 (saline) (*n* = 4) then, ligated loops were injected with  $3 \times 10^8$  *C. difficile* R20291. In the  
742 case of RGD, ligated loops were injected with 250 nmol of RGD peptide (*n* = 4). To  
743 evaluate the role of BclA3 protein in *C. difficile* spore internalization, the ligated loops

744 were injected with 100  $\mu\text{L}$  of 0.9% weight  $\text{vol}^{-1}$  NaCl containing  $5 \times 10^8$  wild-type spore  
745 ( $\Delta\text{pyrE}/\text{pyrE}^+$ ) (SI  $n = 12$ ; colon  $n = 10$ ),  $\Delta\text{bclA3}$  (SI  $n = 12$ ; colon  $n = 12$ ) and  
746  $\Delta\text{bclA3}/\text{bclA3}^+$  (SI  $n = 12$ ; colon  $n = 11$ ). The intestine was returned to the abdomen, and  
747 the incision was closed. Animals were allowed to regain consciousness. Mice were kept for  
748 5 h and were euthanized. The ligated loops were removed and washed gently in PBS prior  
749 to immunostaining, as described below.

750

751 **Immunostaining of ileal and colonic loops.** First, extracted washed intestinal tissues from  
752 the ileal and colonic loops were longitudinally cut, then washed by immersion in PBS 3  
753 times at room temperature (RT). For better visualization of the tissues, they were fixed flat  
754 at RT. To perform this, tissues were fixed over a filter paper imbibed with 30% sucrose  
755 (Winkler, Chile) in PBS–4% paraformaldehyde (Merck, USA) for at least 15 min. Tissues  
756 were transferred to a microcentrifuge tube with the same fixing solution and were incubated  
757 at 4 °C overnight. Since fixation of mucus with cross-linking agents, such as  
758 paraformaldehyde, cause mucus layer of colon to collapse and shrink to a very tiny lining  
759 the epithelia<sup>55</sup>, we did not observe mucus layer in our ileal and colonic loops. Prior to  
760 immunostaining, the intestinal and colonic tissues were cut into  $\sim 5 \times 5$  mm fragments.

761 To quantify *C. difficile* spore adherence and internalization in the colonic and in the  
762 ileal mucosa, tissues were made permeable by incubation with PBS–0.2% Triton X-100  
763 (Merck, USA) and blocked with PBS–3% BSA (Sigma–Aldrich, USA) for 3 h at RT, the  
764 same buffer was used for subsequent incubation with antibodies. Tissue was incubated with  
765 a primary polyclonal 1:1,000 anti-*C. difficile* spore IgY batch 7246 antibodies (Aveslab  
766 USA) in PBS–3% BSA that does not immunoreacted with epitopes of vegetative cells

767 neither with murine microbiota<sup>8</sup> and with 1:50 phalloidin Alexa-Fluor 568 (#ab176753  
768 Abcam, USA) in PBS–3% BSA overnight at 4 °C to stain the actin cytoskeleton. Following  
769 PBS washed, samples were incubated with 1:400 goat anti-chicken IgY secondary  
770 antibodies Alexa-Fluor 488 (#ab150173 Abcam USA) in PBS–3% BSA at RT, washed 3  
771 times with PBS and the cellular nuclei stained with 1:1,000 of Hoechst (ThermoFisher,  
772 USA) for 15 min at RT.

773 To perform double immunostaining acc Fn, acc Vn, acc Muc2, with acc Ecad in  
774 healthy colonic tissue or acc Muc2 with acc Ecad in the intestinal tissue, first the proximal  
775 colon and ilium of 2 independent healthy C57BL/6 mice of 8 weeks old were removed, and  
776 mice were sacrificed. Next, tissues were washed by immersion 3 times in PBS at RT and  
777 they were fixed flat with 30% sucrose in PBS–4% paraformaldehyde as was described  
778 above. Subsequently, tissues cut into ~5 × 5 mm fragments, then were blocked with PBS-  
779 3% BSA (Sigma–Aldrich, USA) for 3 h at RT. And to immunostaining, the acc Ecad, 3  
780 colonic and 1 intestinal tissue fragments of each mouse were incubated with a primary  
781 polyclonal 1:200 rat anti-E-cadherin (#ab11512; Abcam USA) in PBS–3% BSA for  
782 overnight at 4 °C, then tissues were washed, with PBS, and incubated with 1:300 goat anti-  
783 rat IgG secondary antibodies Alexa-Fluor 488 (#A-21470, ThermoFisher, USA) in PBS–  
784 3% BSA for 3 h at RT. Subsequently, to perform the second stain Fn, Vn or Muc2 in  
785 tissues stained for accessible Ecad, all tissues fragments were washed with PBS and then  
786 for i) stain accessible Fn one colonic tissue fragment of each mice was incubated with  
787 1:200 of rabbit anti-fibronectin (SC9068, Santa Cruz Biotechnologies, USA), or to ii) stain  
788 accessible Vn one colonic tissue fragment of each mice was incubated with 1:200 of rabbit  
789 anti-vitronectin (SC15332, Santa Cruz Biotechnologies, USA), and finally iii) to stain

790 accessible Muc2 in colonic and ileum tissue one tissue fragment of each mice was  
791 incubated with 1:200 of rabbit anti-muc2 ab90007 Abcam (#ab90007, Abcam, USA), in  
792 PBS–3% BSA for overnight at 4 °C. at the next day, tissues were incubated with 1:300 of  
793 donkey anti-rabbit IgG secondary antibodies Alexa-Fluor 568 (A11036, Invitrogen, USA)  
794 for 3 h at RT. Subsequently, tissues were washed and were made permeable by incubation  
795 with PBS–0.2% Triton X-100 (Merck, USA) for 1 h at RT. Finally, tissues were incubated  
796 with 1:100 phalloidin Alexa-Fluor 647 (A22287 Invitrogen, USA) for 90 min at RT.

797         The aforementioned immune-stained tissues were subsequently mounted with the  
798 luminal side-up. For this, the colonic crypts and the intestinal villi were identified under  
799 light microscopy with 10× or 40× magnification and were oriented side-up towards the  
800 coverslip. The tissue segment was placed over 5µL of Dako fluorescent mounting medium  
801 (Dako, Denmark) applied onto a glass slide, and the tissue covered with 15 µL Dako  
802 fluorescent mounting medium and closed with a coverslip. Coverslips were affirmed to the  
803 glass slide with vinyl tape to hold the tissue sections in place and were allowed to cure for  
804 at least 24 h before imaging.

805

806 **Confocal microscopic analysis of ileal and colonic loops.** To acquiring images, two  
807 confocal fluorescent microscopes were used; a Leica TCS LSI and a Leica SP8 (Leica,  
808 Germany) at the Confocal Microscopy Core Facility of the Universidad Andrés Bello. In  
809 the first instance to observe spore internalization in the healthy ileum and colonic mucosa, a  
810 Leica TCS LSI was used, with 63× ACS APO oil objective numerical aperture 1.3, and 5×  
811 (optical zoom 20×), numerical aperture 0.5. Confocal micrographs were acquired using  
812 excitation wavelengths of 405 nm, 488 nm, and 532 nm, and signals were detected with an

813 ultra-high dynamic PMT spectral detector (430–750 nm). Emitted fluorescence was split  
814 with four dichroic mirrors (QD405 nm, 488 nm 561 nm, and 635 nm). Images (1,024 ×  
815 1,024 pixels). To observe the sites with acc Fn and Vn in the intestinal barrier and to  
816 evaluate the adherence and internalization of the *ΔbclA3* spore mutant to the intestinal  
817 barrier or to evaluate spore adherence and internalization in mice treated with RGD and  
818 NYS confocal images were acquired in Leica SP8 was used with HPL APO CS2 40× oil,  
819 numerical aperture 1.30. Signals, 3 PMT spectral detector PMT1 (410-483) DAPI PMT2  
820 (505-550) Alexa-Fluor 488 PMT3 (587-726) Alexa-Fluor 555. Emitted fluorescence was  
821 split with dichroic mirrors DD488/552. Three-dimensional reconstructions of intestinal  
822 epithelium were performed using ImageJ software (NIH, USA). Villi and crypts were  
823 visualized by Hoechst and phalloidin signals. 3D reconstruction videos were performed  
824 with Leica software LASX 3D (Leica, Germany).

825       To quantify cells of the colonic and ileum mucosa with accessible proteins  
826 immunodetected, confocal images with a 1- $\mu\text{m}$  Z step size were filtered with Gaussian  
827 Blur 3D (sigma x: 0.6; y: 0.6; z:0.6) and quantifies with cell counting plug-in of ImageJ  
828 1,000 - 1,200 cells were counted in an area 84,628 $\mu\text{m}^2$  per mice.

829       To quantify spore adherence and internalization, confocal images with a 0.7- $\mu\text{m}$  Z  
830 step size were analyzed. Adhered spores were considered as fluorescent-spots that were in  
831 narrow contact with the actin cytoskeleton (visualized with phalloidin), and internalized  
832 spores were considered as fluorescent-spots that were inside the actin cytoskeleton in the  
833 three spatial planes (orthogonal view)<sup>23,56</sup>. The analyzed area for each tissue was 338,512  
834  $\mu\text{m}^2$  per animal.

835           Then we evaluated the spore distribution of adhered and internalized in the colonic  
836 and in the intestinal mucosa. To measure the distribution of adhered spores in the colonic  
837 and ileum mucosa, the perpendicular distance from the center of the spore to the epithelium  
838 was measured using ImageJ (NHI, USA). In the case of internalized spores, we measured  
839 the perpendicular distance from the center of the spore to the mucosa surface or from the  
840 closest crypt membrane. For ileum mucosa, we measure the perpendicular distance from  
841 the center of the spore to the villus tip or to the villus membrane.

842

843 **Visualization of spore internalization in intestinal epithelial cells *in vitro* by confocal**  
844 **microscopy.** Differentiated Caco-2 cells, and T84 cells cultured onto Transwell (Corning  
845 USA) until 1,000–2,000  $\Omega$ . Cells were infected for 5 h with an MOI of 10 with *C. difficile*  
846 spores previously stained with Alexa Fluor 488 Protein Labeling Kit (Molecular Probes,  
847 USA) according to the manufacturer's instruction. Cells were washed 2 twice with PBS and  
848 were permeabilized with PBS–0.06%-Triton X-100 (Merck, USA) for 10 min at RT, were  
849 washed and incubated with 1:150 phalloidin Alexa-Fluor 568 (#ab176753 Abcam, USA) in  
850 PBS–1% BSA for 1h at RT. Then cells were washed, fixed and visualized in a confocal  
851 microscopy Olympus FV1000 of the Confocal Microscopy Core Facility of the Andrés  
852 Bello University.

853

854 **Sample preparation for Transmission Electron Microscopy and Immuno-electron**  
855 **microscopy.** To visualize internalized spores in IECs, six-well plates containing  
856 differentiated Caco-2 cells or T84 cells cultured in transwell as was described above were  
857 infected for 5 h at 37 °C at an MOI of 20 with *C. difficile* R20291 spores pre-incubated 1h  
858 at 37 °C with 100  $\mu$ L of NHS (Complement Technology USA) for each well, and then was

859 suspended in the infection volume of 1mL; FBS final concentration 10% vol vol<sup>-1</sup> FBS.  
860 Unbound spores rinsed o□, and cells were scraped, fixed, and processed, as is described  
861 below.

862 To evaluate the binding of Fn and Vn to the surface of *C. difficile* spores,  $4 \times 10^7$  *C.*  
863 *difficile* spore- were incubated in PBS–0.2% BSA containing 10  $\mu\text{g ml}^{-1}$  of human Fn and  
864 Vn for 1h at 37 °C. The spores were then washed three times (18,400 $\times g$  for 5 minutes at  
865 RT) with PBS. Then the spores were pelleted by one cycle of centrifugation at 18,400  $\times g$   
866 for 10 min. Pellets were then resuspended in 200  $\mu\text{l}$  PBS-1% BSA, incubated for 30 min at  
867 RT, and then sedimented by centrifugation at 18,400  $\times g$  for 10 min at RT. Pellets were  
868 resuspended as above and incubated with primary antibody 1:200 rabbit pAb against Fn  
869 (SC9068, Santa Cruz Biotechnology USA) or Vn (SC15332, Santa Cruz Biotechnology,  
870 USA) in PBS-BSA 1% for 1 h at RT. The excess of antibody was eliminated by three  
871 cycles of centrifugation at 18,400 $\times g$  for 5 min at RT and resuspension in PBS–0.1% BSA.  
872 Spore suspensions were then incubated for 1 h with 1:20 donkey anti-rabbit IgG antibody  
873 coupled to 12–nm gold particles (Abcam ab105295, USA) in PBS-1% BSA for 1h at RT.  
874 And were washed by triple centrifugation at 18,400 $\times g$  for 5 min. Subsequently, samples  
875 were fixed and processed, as is described below.

876 To visualizes if the collagen-like BclA3 exosporium protein forms the hair like-  
877 extension of *C. difficile* spores,  $\sim 2 \times 10^8$  *C. difficile* purified spores of wild-type R20291  
878 ( $\Delta\text{pyrE}/\text{pyrE}^+$ ),  $\Delta\text{bclA3}$  and  $\Delta\text{bclA3}/\text{bclA3}^+$  fixed and processes as is described here below.

879

880 **Sample processing and staining for transmission electron microscopy.** The  
881 aforementioned spore or monolayers of infected IECs samples were fixed with freshly



882 prepared with 2.5% glutaraldehyde 1% paraformaldehyde in 0.1 M cacodylate buffer (pH  
883 7.2) overnight at 4 °C, rinsed in cacodylate buffer, and stained for 30 min with 1% tannic  
884 acid. Then samples were serially dehydrated with acetone 30% (with or without 2% uranyl  
885 acetate) for 20 min, 50% for 20 min, 75% for 20 min, 90% for 20 min, and twice with  
886 100% for 20 min, embedded in spurs resin at ratio acetone: spurs of 3:1, 1:1, and 1:3 for 40  
887 min each and then resuspended in spurs for 4 h and baked overnight at 65 °C, and prepared  
888 for transmission electron microscopy as previously described<sup>15</sup>. Thin sections (90 nm)  
889 obtained with a microtome were placed on glow discharge carbon-coated grids for negative  
890 staining and double lead stained with 2% uranyl acetate and lead citrate. Grids were  
891 analyzed with a Phillips Tecnai 12 Bio Twin electron microscope of the Universidad  
892 Católica de Chile.

893

894 **R-CDI mouse model.** Antibiotic cocktail (ATB cocktail) was administrated, as was  
895 previously described<sup>8</sup>. Briefly, an antibiotic cocktail containing 40 mg kg<sup>-1</sup> kanamycin  
896 (Sigma–Aldrich, USA), 3.5 mg kg<sup>-1</sup> gentamicin (Sigma–Aldrich, USA), 4.2 mg kg<sup>-1</sup>  
897 colistin (Sigma–Aldrich, USA), 21.5 mg kg<sup>-1</sup> metronidazole (Sigma–Aldrich, USA) and  
898 4.5 mg kg<sup>-1</sup> vancomycin (VAN) (Sigma–Aldrich, USA) was administrated via gavage for  
899 3 days (days -6 to -4 before the infection). Then 1 day before the infection (day -1), an  
900 intraperitoneal (i.p.) injection of 10 mg kg<sup>-1</sup> clindamycin (Sigma–Aldrich, USA) was  
901 administrated to all mice. The next day all mice were infected via gavage with  $1 \times 10^7$   
902 spores R20291, and on day 3 post-infection, DPBS containing 17,000 UI kg<sup>-1</sup> of nystatin  
903 and 50 mg kg<sup>-1</sup> vancomycin or vancomycin alone (as control) was orally administered for 5  
904 days to 18 and 23 mice, respectively.

905 To evaluate the role of the exosporium protein BclA3 in the R-CDI, 40 treated mice  
906 with antibiotic cocktail followed with clindamycin, were infected orally with 100  $\mu$ l PBS  
907 containing  $5 \times 10^7$  *C. difficile* spore strain R20291 of wild-type ( $\Delta$ *pyrE*/*pyrE*<sup>+</sup>) ( $n = 10$ ),  
908  $\Delta$ *bclA3* ( $n = 16$ ) or  $\Delta$ *bclA3/bclA3*<sup>+</sup> ( $n = 14$ ) strains. *C. difficile*-infected mice were housed  
909 individually in sterile cages with *ad libitum* access to food and water. All procedures and  
910 mouse handling were performed aseptically in a biosafety cabinet to contain spore mediated  
911 transmission and cross-contamination. Mice were daily monitored for loss weight, aspect,  
912 and diarrhea were measured to determine the endpoint of each animal.

913 During the entire experiment, the clinical condition (sickness behaviors and fecal  
914 samples) of mice was monitored daily with a scoring system. The presence of diarrhea was  
915 classified according to severity as follows: (i) normal stool (score = 1); (ii) color change  
916 and/or consistency (score = 2); (iii) presence of wet tail or mucosa (score = 3); (iv) liquid  
917 stools (score = 4). A score higher than 1 was considered as diarrhea<sup>57</sup>. At the end of the  
918 assay, animals were sacrificed with a lethal dose of ketamine and xylazine. Cecum content  
919 and colonic tissues were collected.

920

921 **Quantification of *C. difficile* spores from feces and colon of mice.** To quantify *C.*  
922 *difficile* spores in feces, daily collected fecal samples were stored at  $-20$  °C until spore  
923 quantification.

924 Feces were hydrated in 500  $\mu$ L sterile Milli-Q water overnight at 4 °C and then mixed with  
925 500  $\mu$ L of absolute ethanol (Merck, USA) for 60 min at RT. Then, serially dilutions of the  
926 sample were plated onto selective medium supplemented with 0.1% weight vol<sup>-1</sup>  
927 taurocholate, 16  $\mu$ g ml<sup>-1</sup> cefoxitin, 250  $\mu$ g mL<sup>-1</sup> L-cycloserine and 1.5% weight vol<sup>-1</sup> (BD,

928 USA) (TCCFA plates). The plates were incubated anaerobically at 37 °C for 48 h, colonies  
929 counted, and results expressed as the  $\text{Log}_{10}$  (CFU  $\text{g}^{-1}$  of feces)<sup>58</sup>. Colonic tissue collected at  
930 the end of the experiment was washed three times with PBS. The tissue *C. difficile* spore-  
931 load was determined in the proximal colon, medium colon, distal colon, and cecum tissue.  
932 Tissues were weighed and adjusted at a concentration of 100 mg  $\text{mL}^{-1}$  with a 1:1 mix of  
933 PBS: absolute ethanol, then homogenized and incubated for 1 h at RT. The amounts of  
934 viable spores were quantified plating the homogenized tissue onto TCCFA plates, as  
935 described previously<sup>18</sup>. The plates were incubated anaerobically at for 48 h at 37 °C.  
936 Finally, the colony count was expressed as the  $\text{Log}_{10}$  (CFU  $\text{g}^{-1}$  of the tissue).

937

938 **Cecum content cytotoxicity assay in Vero cells of infected mice during R-CDI.** Vero  
939 cell cytotoxicity was performed as described previously<sup>59</sup>. At first, 96-well flat-bottom  
940 microtiter plates were seeded with Vero cells at a density of  $10^5$  cells  $\text{well}^{-1}$ . Mice cecum  
941 contents were suspended in PBS at a ratio of 1:10 (100 mg  $\text{mL}^{-1}$  of cecum content),  
942 vortexed and centrifuged at 18,400 $\times g$  for 5 min, the supernatant was sterilized with a  
943 0.22 $\mu\text{m}$  filter and serially diluted in DMEM supplemented with 10% vol  $\text{vol}^{-1}$  FBS and 100  
944 U  $\text{ml}^{-1}$  penicillin, and 100  $\mu\text{g ml}^{-1}$  streptomycin; then 100  $\mu\text{L}$  of each dilution was added to  
945 wells containing Vero cells. Plates were screened for cell rounding 16 h after incubation at  
946 37 °C. The cytotoxic titer was defined as the reciprocal of the highest dilution that  
947 produced rounding in at least 80% of Vero cells per gram of luminal samples under 20 $\times$   
948 magnification.

949

950 **Statistical analysis.** Prism 7 (GraphPad Software, Inc.) was used for statistical analysis.  
951 Student's *t*-test and the nonparametric test was used for pairwise comparison. Significance  
952 between groups was done by Mann-Whitney unpaired *t*-test. Comparative study between  
953 groups for *in vitro* experiments was analyzed by analysis of variance with post-hoc Student  
954 *t*-tests with Bonferroni corrections for multiple comparisons, as appropriate. A *P*-value of  $\leq$   
955 0.05 was accepted as the level of statistical significance. Differences in the percentages of  
956 mice with normal stools, as well as percentages of mice with *C. difficile* infection, were  
957 determined by Gehan-Breslow-Wilcoxon test.

958

#### 959 **Acknowledgments**

960 This work was funded by FONDECYT Regular 1191601 and FONDECYT Regular  
961 1151025 to D.P-S. Millennium Nucleus of the Biology of the Intestinal Microbiota to D.P-  
962 S. PC-C had been supported by ANID doctoral fellowship 21161395 (Chile) and JO-A by  
963 OAIICE-91-2018 of Universidad de Costa Rica. The authors acknowledge Rosario  
964 Hernandez-Armengol for technical assistance and Miriam Barros for useful discussion on  
965 image processing at the Confocal Microscopy Core Facility of the Universidad Andrés  
966 Bello. We certify that funding sources had no implication in the study design, collection of  
967 data, analysis, and interpretation of data.

968

969 **Competing of Interests:** DP-S and PC-C are inventors on a PCT patent relating to a  
970 method and pharmacological composition for the prevention of recurrent infections caused  
971 by *Clostridium difficile*, submitted by Universidad Andrés Bello. The other authors declare  
972 no competing interests.

973 **References**

- 974 1 Paredes-Sabja, D., Shen, A. & Sorg, J. A. *Clostridium difficile* spore biology:  
975 sporulation, germination, and spore structural proteins. *Trends Microbiol* **22**, 406-  
976 416.
- 977 2 Lessa, F. C. *et al.* Burden of *Clostridium difficile* infection in the United States. *N*  
978 *Engl J Med* **372**, 825-834.
- 979 3 Evans, M. E., Simbartl, L. A., Kralovic, S. M., Jain, R. & Roselle, G. A.  
980 *Clostridium difficile* infections in Veterans Health Administration acute care  
981 facilities. *Infect Control Hosp Epidemiol* **35**, 1037-1042.
- 982 4 Bakken, T. L. & Sageng, H. Mental Health Nursing of Adults With Intellectual  
983 Disabilities and Mental Illness: A Review of Empirical Studies 1994-2013. *Arch*  
984 *Psychiatr Nurs* **30**, 286-291.
- 985 5 Bouza, E. Consequences of *Clostridium difficile* infection: understanding the  
986 healthcare burden. *Clin Microbiol Infect* **18 Suppl 6**, 5-12.
- 987 6 Smits, W. K., Lyras, D., Lacy, D. B., Wilcox, M. H. & Kuijper, E. J. *Clostridium*  
988 *difficile* infection. *Nat Rev Dis Primers* **2**, 16020.
- 989 7 Deakin, L. J. *et al.* The *Clostridium difficile* spo0A gene is a persistence and  
990 transmission factor. *Infect Immun* **80**, 2704-2711.
- 991 8 Pizarro-Guajardo, M., Diaz-Gonzalez, F., Alvarez-Lobos, M. & Paredes-Sabja, D.  
992 Characterization of Chicken IgY Specific to *Clostridium difficile* R20291 Spores  
993 and the Effect of Oral Administration in Mouse Models of Initiation and Recurrent  
994 Disease. *Front Cell Infect Microbiol* **7**, 365.
- 995 9 Hong, H. A. *et al.* The Spore Coat Protein CotE Facilitates Host Colonization by  
996 *Clostridium difficile*. *J Infect Dis* **216**, 1452-1459.
- 997 10 Phetcharaburanin, J. *et al.* The spore-associated protein BclA1 affects the  
998 susceptibility of animals to colonization and infection by *Clostridium difficile*. *Mol*  
999 *Microbiol* **92**, 1025-1038.
- 1000 11 Pizarro-Guajardo, M., Calderon-Romero, P., Castro-Cordova, P., Mora-Uribe, P. &  
1001 Paredes-Sabja, D. Ultrastructural Variability of the Exosporium Layer of  
1002 *Clostridium difficile* Spores. *Appl Environ Microbiol* **82**, 2202-2209.
- 1003 12 Pizarro-Guajardo, M., Calderon-Romero, P. & Paredes-Sabja, D. Ultrastructure  
1004 Variability of the Exosporium Layer of *Clostridium difficile* Spores from  
1005 Sporulating Cultures and Biofilms. *Appl Environ Microbiol* **82**, 5892-5898.
- 1006 13 Pizarro-Guajardo, M. *et al.* Characterization of the collagen-like exosporium  
1007 protein, BclA1, of *Clostridium difficile* spores. *Anaerobe* **25**, 18-30.
- 1008 14 Paredes-Sabja, D. & Sarker, M. R. Adherence of *Clostridium difficile* spores to  
1009 Caco-2 cells in culture. *J Med Microbiol* **61**, 1208-1218.
- 1010 15 Mora-Uribe, P. *et al.* Characterization of the Adherence of *Clostridium difficile*  
1011 Spores: The Integrity of the Outermost Layer Affects Adherence Properties of  
1012 Spores of the Epidemic Strain R20291 to Components of the Intestinal Mucosa.  
1013 *Front Cell Infect Microbiol* **6**, 99.
- 1014 16 Henderson, B., Nair, S., Pallas, J. & Williams, M. A. Fibronectin: a multidomain  
1015 host adhesin targeted by bacterial fibronectin-binding proteins. *FEMS Microbiol*  
1016 *Rev* **35**, 147-200.

- 1017 17 Singh, B., Su, Y. C. & Riesbeck, K. Vitronectin in bacterial pathogenesis: a host  
1018 protein used in complement escape and cellular invasion. *Mol Microbiol* **78**, 545-  
1019 560.
- 1020 18 Calderon-Romero, P. *et al.* *Clostridium difficile* exosporium cysteine-rich proteins  
1021 are essential for the morphogenesis of the exosporium layer, spore resistance, and  
1022 affect *C. difficile* pathogenesis. *PLoS Pathog* **14**, e1007199.
- 1023 19 Barra-Carrasco, J. *et al.* The *Clostridium difficile* exosporium cysteine (CdeC)-rich  
1024 protein is required for exosporium morphogenesis and coat assembly. *J Bacteriol*  
1025 **195**, 3863-3875.
- 1026 20 Redick, S. D., Settles, D. L., Briscoe, G. & Erickson, H. P. Defining fibronectin's  
1027 cell adhesion synergy site by site-directed mutagenesis. *J Cell Biol* **149**, 521-527.
- 1028 21 Leroy-Dudal, J., Gagniere, H., Cossard, E., Carreiras, F. & Di Martino, P. Role of  
1029 alphavbeta5 integrins and vitronectin in *Pseudomonas aeruginosa* PAK interaction  
1030 with A549 respiratory cells. *Microbes Infect* **6**, 875-881.
- 1031 22 Nikitas, G. *et al.* Transcytosis of *Listeria monocytogenes* across the intestinal  
1032 barrier upon specific targeting of goblet cell accessible E-cadherin. *J Exp Med* **208**,  
1033 2263-2277.
- 1034 23 Pentecost, M., Kumaran, J., Ghosh, P. & Amieva, M. R. *Listeria monocytogenes*  
1035 internalin B activates junctional endocytosis to accelerate intestinal invasion. *PLoS*  
1036 *Pathog* **6**, e1000900.
- 1037 24 Pentecost, M., Otto, G., Theriot, J. A. & Amieva, M. R. *Listeria monocytogenes*  
1038 invades the epithelial junctions at sites of cell extrusion. *PLoS Pathog* **2**, e3.
- 1039 25 van Klinken, B. J. *et al.* Gastrointestinal expression and partial cDNA cloning of  
1040 murine Muc2. *Am J Physiol* **276**, G115-124.
- 1041 26 Humtsoe, J. O. *et al.* A streptococcal collagen-like protein interacts with the  
1042 alpha2beta1 integrin and induces intracellular signaling. *J Biol Chem* **280**, 13848-  
1043 13857.
- 1044 27 Caswell, C. C. *et al.* Identification of the first prokaryotic collagen sequence motif  
1045 that mediates binding to human collagen receptors, integrins alpha2beta1 and  
1046 alpha1beta1. *J Biol Chem* **283**, 36168-36175.
- 1047 28 Girinathan, B. P. *et al.* Effect of tcdR Mutation on Sporulation in the Epidemic  
1048 *Clostridium difficile* Strain R20291. *mSphere* **2**.
- 1049 29 Ehsaan, M., Kuehne, S. A. & Minton, N. P. *Clostridium difficile* Genome Editing  
1050 Using *pyrE* Alleles. *Methods Mol Biol* **1476**, 35-52.
- 1051 30 Hoffmann, C. *et al.* Caveolin limits membrane microdomain mobility and integrin-  
1052 mediated uptake of fibronectin-binding pathogens. *J Cell Sci* **123**, 4280-4291.
- 1053 31 Gianni, T., Gatta, V. & Campadelli-Fiume, G. {alpha}V{beta}3-integrin routes  
1054 herpes simplex virus to an entry pathway dependent on cholesterol-rich lipid rafts  
1055 and dynamin2. *Proc Natl Acad Sci U S A* **107**, 22260-22265.
- 1056 32 Sui, Z. H. *et al.* Intracellular Trafficking Pathways of *Edwardsiella tarda*: From  
1057 Clathrin- and Caveolin-Mediated Endocytosis to Endosome and Lysosome. *Front*  
1058 *Cell Infect Microbiol* **7**, 400.
- 1059 33 Vrieze, A. *et al.* Impact of oral vancomycin on gut microbiota, bile acid  
1060 metabolism, and insulin sensitivity. *J Hepatol* **60**, 824-831.
- 1061 34 Theriot, C. M., Bowman, A. A. & Young, V. B. Antibiotic-Induced Alterations of  
1062 the Gut Microbiota Alter Secondary Bile Acid Production and Allow for

- 1063 *Clostridium difficile* Spore Germination and Outgrowth in the Large Intestine.  
1064 *mSphere* **1**.
- 1065 35 Theriot, C. M. *et al.* Antibiotic-induced shifts in the mouse gut microbiome and  
1066 metabolome increase susceptibility to *Clostridium difficile* infection. *Nat Commun*  
1067 **5**, 3114.
- 1068 36 Kapp, T. G. *et al.* A Comprehensive Evaluation of the Activity and Selectivity  
1069 Profile of Ligands for RGD-binding Integrins. *Sci Rep* **7**, 39805.
- 1070 37 Clark, M. A., Hirst, B. H. & Jepson, M. A. M-cell surface beta1 integrin expression  
1071 and invasin-mediated targeting of *Yersinia pseudotuberculosis* to mouse Peyer's  
1072 patch M cells. *Infect Immun* **66**, 1237-1243.
- 1073 38 Hamzaoui, N., Kerneis, S., Caliot, E. & Pringault, E. Expression and distribution of  
1074 beta1 integrins in in vitro-induced M cells: implications for *Yersinia* adhesion to  
1075 Peyer's patch epithelium. *Cell Microbiol* **6**, 817-828.
- 1076 39 Treuting, P. M., Dintzis, S. M. & Montine, K. S. *Comparative anatomy and*  
1077 *histology. A mouse, rat and human atlas*. Second Edition edn, 552 (2018).
- 1078 40 Clevers, H. The intestinal crypt, a prototype stem cell compartment. *Cell* **154**, 274-  
1079 284.
- 1080 41 Noah, T. K., Donahue, B. & Shroyer, N. F. Intestinal development and  
1081 differentiation. *Exp Cell Res* **317**, 2702-2710.
- 1082 42 Cheng, H. & Leblond, C. P. Origin, differentiation and renewal of the four main  
1083 epithelial cell types in the mouse small intestine. V. Unitarian Theory of the origin  
1084 of the four epithelial cell types. *Am J Anat* **141**, 537-561.
- 1085 43 Barker, N. Adult intestinal stem cells: critical drivers of epithelial homeostasis and  
1086 regeneration. *Nat Rev Mol Cell Biol* **15**, 19-33.
- 1087 44 Kelly, C. P. Can we identify patients at high risk of recurrent *Clostridium difficile*  
1088 infection? *Clin Microbiol Infect* **18 Suppl 6**, 21-27.
- 1089 45 Mukherjee, P. K. *et al.* Topical gentian violet compared with nystatin oral  
1090 suspension for the treatment of oropharyngeal candidiasis in HIV-1-infected  
1091 participants. *AIDS* **31**, 81-88.
- 1092 46 Cartman, S. T. & Minton, N. P. A mariner-based transposon system for in vivo  
1093 random mutagenesis of *Clostridium difficile*. *Appl Environ Microbiol* **76**, 1103-  
1094 1109.
- 1095 47 Ng, Y. K. *et al.* Expanding the repertoire of gene tools for precise manipulation of  
1096 the *Clostridium difficile* genome: allelic exchange using *pyrE* alleles. *PLoS One* **8**,  
1097 e56051.
- 1098 48 Ingle, P. *et al.* Generation of a fully erythromycin-sensitive strain of *Clostridioides*  
1099 *difficile* using a novel CRISPR-Cas9 genome editing system. *Sci Rep* **9**, 8123.
- 1100 49 Karasawa, T., Ikoma, S., Yamakawa, K. & Nakamura, S. A defined growth medium  
1101 for *Clostridium difficile*. *Microbiology* **141 (Pt 2)**, 371-375.
- 1102 50 Laukaitis, C. M., Webb, D. J., Donais, K. & Horwitz, A. F. Differential dynamics of  
1103 alpha 5 integrin, paxillin, and alpha-actinin during formation and disassembly of  
1104 adhesions in migrating cells. *J Cell Biol* **153**, 1427-1440.
- 1105 51 Shu, X. *et al.* A genetically encoded tag for correlated light and electron microscopy  
1106 of intact cells, tissues, and organisms. *PLoS Biol* **9**, e1001041.
- 1107 52 Parsons, M., Messent, A. J., Humphries, J. D., Deakin, N. O. & Humphries, M. J.  
1108 Quantification of integrin receptor agonism by fluorescence lifetime imaging. *J Cell*  
1109 *Sci* **121**, 265-271.

- 1110 53 Paredes-Sabja, D., Cofre-Araneda, G., Brito-Silva, C., Pizarro-Guajardo, M. &  
1111 Sarker, M. R. *Clostridium difficile* spore-macrophage interactions: spore survival.  
1112 *PLoS One* **7**, e43635.
- 1113 54 Plaza-Garrido, A. *et al.* Outcome of relapsing *Clostridium difficile* infections do not  
1114 correlate with virulence-, spore- and vegetative cell-associated phenotypes.  
1115 *Anaerobe* **36**, 30-38.
- 1116 55 Johansson, M. E., Larsson, J. M. & Hansson, G. C. The two mucus layers of colon  
1117 are organized by the MUC2 mucin, whereas the outer layer is a legislator of host-  
1118 microbial interactions. *Proc Natl Acad Sci U S A* **108 Suppl 1**, 4659-4665.
- 1119 56 Lee, S. M. *et al.* Bacterial colonization factors control specificity and stability of the  
1120 gut microbiota. *Nature* **501**, 426-429.
- 1121 57 Warren, C. A. *et al.* Vancomycin treatment's association with delayed intestinal  
1122 tissue injury, clostridial overgrowth, and recurrence of *Clostridium difficile*  
1123 infection in mice. *Antimicrob Agents Chemother* **57**, 689-696.
- 1124 58 Trindade, B. C. *et al.* *Clostridium difficile*-induced colitis in mice is independent of  
1125 leukotrienes. *Anaerobe* **30**, 90-98.
- 1126 59 Theriot, C. M. *et al.* Cefoperazone-treated mice as an experimental platform to  
1127 assess differential virulence of *Clostridium difficile* strains. *Gut Microbes* **2**, 326-  
1128 334.
- 1129
- 1130
- 1131



1132 **Figure Legend**

1133

1134 **Fig. 1 | *C. difficile* adherence and internalization into intestinal barrier *in vivo*. a, b**

1135 Confocal micrographs of fixed whole-mount of **a** colonic mucosa, and **b** ileum mucosa (SI)

1136 loop of C57BL/6 mice infected with  $5 \times 10^8$  *C. difficile* R20291 spores for 5 h. *C. difficile*

1137 spores are shown in red, F-actin is shown in green and nuclei in blue (fluorophores colors

1138 were digitally reassigned for a better representation). **c**, Adherence of *C. difficile* spores to

1139 SI and colonic mice tissue. **d**, Distance of adhered spores from the villus tip or from the

1140 colonic epithelial apical surface. **e**, Quantification of internalized *C. difficile* spores in the

1141 SI and colon. **f**, Distance of internalized spores from the villus tip for the ileum or from the

1142 epithelium surface for the colon. Micrographs are representative of mice ( $n = 3$ ). White

1143 arrow indicates internalized *C. difficile* spores, empty arrow indicates adhered *C. difficile*

1144 spore. Scale bar, 20  $\mu\text{m}$ . Error bars indicate the mean  $\pm$  S.E.M. Statistical analysis was

1145 performed by Mann-Whitney test, ns indicates non-significant differences, \*  $P < 0.0001$ .

1146

1147 **Fig. 2 | *C. difficile* spores are internalized by intestinal epithelial cells. a** Confocal

1148 microscopy of an internalized *C. difficile* 630 spore in T84 cells. *C. difficile* spores are

1149 shown in red, F-actin is shown in green (fluorophores colors were digitally reassigned for a

1150 better representation). Yellow lines indicate an internalized spore. **b–e** TEM of

1151 differentiated T84 cell monolayers infected with *C. difficile* 630 spores. Black and white

1152 arrows denote extracellular and intracellular *C. difficile* spores, respectively. **c**, **d** are

1153 magnifications of black squares of **b**. **e** show an adhered *C. difficile* spore and an apical

1154 membrane extension of T84 cells surrounding *C. difficile* spores. **f–h** TEM of differentiated

1155 monolayers of Caco-2 cells infected with *C. difficile* R20291 spores. White arrows in panel  
1156 **f** indicate internalized *C. difficile* spores. **g**, **h** are magnifications of black boxes in panel **f**.  
1157 Internalization of *C. difficile* spores **i** strain 630 and, **j** R20291 pre-incubated with FBS or  
1158 culture media in Caco-2 undifferentiated (2 days), differentiated (8 days), T84, Vero, and  
1159 HT29. **k**, Internalization of *C. difficile* spores pre-incubated with serum of different  
1160 mammalian species in Caco-2 cells. Error bars indicate the mean  $\pm$  S.E.M. Scale bars **a** 5  
1161  $\mu\text{m}$ ; **c**, **d**, 100 nm; **e**, 1  $\mu\text{m}$ ; **f**, 2  $\mu\text{m}$ ; **g**, 200nm; **h**, 500nm.

1162

1163 **Fig. 3 | *C. difficile* spore internalization requires Fn and Vn which are lumenally**  
1164 **accessible in the intestinal barrier. a** Internalization **b** and adherence of *C. difficile* spores  
1165 pre-incubated with NHS in differentiated Caco-2 monolayers in the presence of 5  $\mu\text{g}$  RGD  
1166 peptide. **c**, **d** differentiated Caco-2 cells were infected with *C. difficile* spores pre-incubated  
1167 with DMEM, NHS, 10, or 20  $\mu\text{g mL}^{-1}$  Fn or Vn. Data shown in each panel are normalized  
1168 to the control (0  $\mu\text{g mL}^{-1}$  RGD or DMEM) and represent the mean of three independent  
1169 experiments. **e**, **f**, **g** confocal micrographs of fixed whole-mount of the healthy colon of  
1170 C57BL/6 mice for **e**, acc Fn; **f**, acc Vn; and **g**, acc Muc2 with acc Ecad. The main figure  
1171 shown a 3D projection, below magnifications and a z-stack of representative cells with  
1172 different immunostaining. **h** Shown the cell repartition of cell immunodetected for acc  
1173 Ecad. **i** Shown the cell repartition of cells immunodetected for acc Fn. **j** Cell repartition of  
1174 total acc Fn cells that were immunodetected for acc E-cad. **k** shown the cell repartition of  
1175 cells immunodetected for acc Vn. **l** Cell repartition of total acc Vn cells that were  
1176 immunodetected for acc E-cad. **m** shown the cell repartition of cells immunodetected for  
1177 acc Muc2. **n** Cell repartition of total acc Muc2 cells that were immunodetected for acc E-

1178 cad. Acc-FN, acc-VN and Muc2 is shown in green, Acc-Ecad is shown in red and F-actin  
1179 in grey (fluorophores colors were digitally reassigned for a better representation). Scale bar,  
1180 20 $\mu$ m. Micrographs are representative of mice ( $n = 2$ ). 1,000 - 1,200 cells were counted for  
1181 each mouse in an area 84,628 $\mu$ m<sup>2</sup>. Error bars indicate mean  $\pm$  S.E.M. Statistical analysis  
1182 was performed by Student's *t*-test, ns indicates non-significant differences, \*  $P < 0.05$  and  
1183 \*\*  $P < 0.001$ . Scale bar, 20  $\mu$ m.

1184

1185 **Fig. 4 | *C. difficile* spore internalization via fibronectin- $\alpha_5\beta_1$  and vitronectin- $\alpha_v\beta_1$**   
1186 **integrins intestinal epithelial cells.** *C. difficile* spore internalization in **a–d** differentiated  
1187 Caco-2 cells incubated for 1 h with 1, 3, and 5  $\mu$ g/mL of RGD peptide and infected with *C.*  
1188 *difficile* spores pre-incubated for 1 h with **a, c**, 10  $\mu$ g mL<sup>-1</sup> Fn and **b, d**, 10  $\mu$ g mL<sup>-1</sup> Vn.  
1189 **e–h** Differentiated Caco-2 monolayers were incubated for 1 h with 10  $\mu$ g mL<sup>-1</sup> of antibody  
1190 against  $\alpha_v$ ,  $\alpha_2$ ,  $\alpha_5$ ,  $\beta_1$ ,  $\beta_3$ , non-immune IgG antibody or without antibody. Then were infected  
1191 with *C. difficile* spores R20291 pre-incubated with 10  $\mu$ g mL<sup>-1</sup> of **e, f**, Fn or **g, h**, Vn. **i–k**,  
1192 show immunoblotting of cell lysates of CHO cells transfected with ectopic expression of **i**  
1193  $\alpha_5$  (~120 kDa); **j**  $\alpha_v$  (~120 kDa); and **k**  $\beta_1$  (~120 kDa) and alpha-tubulin as a loading control  
1194 (50 kDa). *C. difficile* spore **l, n** internalization or **m, o** adherence in CHO cells ectopically  
1195 expressing  $\alpha_v$ ,  $\alpha_5$ ,  $\beta_1$  integrins, of spores pre-treated 1 h with **l, o** 10  $\mu$ g mL<sup>-1</sup> of Fn and **n, o**,  
1196 10  $\mu$ g mL<sup>-1</sup> of Vn. Data shown in each panel are normalized to the control (0  $\mu$ g mL<sup>-1</sup>  
1197 RGD, DMEM, or IgG) and represent the mean of three independent experiments. Error bars  
1198 indicate mean  $\pm$  S.E.M. Statistical analysis was performed by Student's *t*-test, ns indicates  
1199 non-significant differences, \*  $P < 0.05$  and \*\*  $P < 0.001$ .

1200

1201 **Fig. 5 | The collagen-like exosporium protein BclA3 is required for spore-entry into**  
1202 **intestinal epithelial cells via Fn- $\alpha_5\beta_1$  and Vn- $\alpha_v\beta_1$ .** **a, b** Immunogold of Fn and Vn  
1203 binding to the hair-like extensions of *C. difficile* spores. *C. difficile* spores R20291 were  
1204 incubated with 10  $\mu\text{g mL}^{-1}$  Fn or Vn for 1 h. Samples were processed and visualized for  
1205 TEM. White arrows indicate anti-Fn or -Vn rabbit antibody and anti-rabbit-gold 12 nm  
1206 antibody complex. **ce** TEM of wild-type ( $\Delta\text{pyrE}/\text{pyrE}^+$ ),  $\Delta\text{bclA3}$  and  $\Delta\text{bclA3}/\text{bclA3}^+$  *C.*  
1207 *difficile* R20291 spores. **f, h** Internalization and **g, i** adherence in differentiated Caco-2 cells  
1208 of wild-type ( $\Delta\text{pyrE}/\text{pyrE}^+$ ),  $\Delta\text{bclA3}$  and  $\Delta\text{bclA3}/\text{bclA3}^+$  *C. difficile* R20291 spores pre-  
1209 incubated with **f, g** 10  $\mu\text{g mL}^{-1}$  Fn and **h, i** 10  $\mu\text{g mL}^{-1}$  Vn. **j, l** internalization and **k, m**  
1210 adherence in CHO cells ectopically expressing: **j**  $\alpha_5$ ; **k, m**;  $\beta_1$  or **l**  $\alpha_v$  infected with wild-type  
1211 ( $\Delta\text{pyrE}/\text{pyrE}^+$ ),  $\Delta\text{bclA3}$  and  $\Delta\text{bclA3}/\text{bclA3}^+$  *C. difficile* R20291 spores pre-incubated with  
1212 **j, k** 10  $\mu\text{g mL}^{-1}$  Fn and **l, m** 10  $\mu\text{g mL}^{-1}$  Vn. Data shows internalization and adherence  
1213 normalized to wild-type spores and represented the mean of three independent experiments.  
1214 Error bars indicate the mean  $\pm$  S.E.M. Statistical analysis was performed by Student's *t*-  
1215 test, ns indicates non-significant differences, \*  $P < 0.005$ , \*\* $P < 0.0001$ . **a–e**, Scale bar,  
1216 100 nm.

1217

1218 **Fig. 6 | BclA3 is involved in *C. difficile* spore adherence to the intestinal mucosa and**  
1219 **delays the onset of diarrhea during R-CDI.**

1220 Intestinal loops of approximately ~1.5 cm of the ileum and colon were injected with  $5 \times 10^8$   
1221 *C. difficile* R20291 spores of strains wild-type ( $\Delta\text{pyrE}/\text{pyrE}^+$ ) (SI  $n = 12$ ; colon  $n = 10$ ),  
1222  $\Delta\text{bclA3}$  (SI  $n = 12$ ; colon  $n = 12$ ) and  $\Delta\text{bclA3}/\text{bclA3}^+$  (SI  $n = 12$ ; colon  $n = 11$ ). **a–c**  
1223 Representative confocal micrographs. *C. difficile* spores are shown in red, F-actin is shown

1224 in green and nuclei in blue (fluorophores colors were digitally reassigned for a better  
1225 representation). The white arrows indicate internalized *C. difficile* spores, empty arrows  
1226 indicate adhered *C. difficile* spore. Quantification of the spots (spores) number per  $10^5 \mu\text{m}^2$   
1227 relatives to wild-type of **d** adhered or **e** internalized in the ileum, and **f** adhered or **g**  
1228 internalized in the colonic mucosa. **h** Schematics of the experimental design. Mice were  
1229 infected with  $5 \times 10^7$  *C. difficile* spores strain R20291, wild-type ( $\Delta\text{pyrE}/\text{pyrE}^+$ ) ( $n = 10$ ),  
1230  $\Delta\text{bclA3}$  ( $n = 16$ ) or  $\Delta\text{bclA3}/\text{bclA3}^+$  ( $n = 14$ ) and were treated with vancomycin from day 3  
1231 to 7 and were monitored daily for **i**, relative weight during the R-CDI, **j** onset of diarrhea  
1232 during the R-CDI. Spore adherence to the colonic tract was evaluated on day 11 to **k**  
1233 medium colon.  
1234 Error bars indicate the mean  $\pm$  S.E.M. Statistical analysis was performed by **d–g** Mann-  
1235 Whitney test; **j** Log-rank (Mantel-Cox) test ns indicates non-significant differences; \*  $P <$   
1236 0.05, \*\* $P < 0.001$ .

1237

1238 **Fig. 7 | Nystatin reduces *C. difficile* spore internalization and reduces the R-CDI rates.**

1239 **a** Internalization and **b** adherence of undifferentiated Caco-2 cells were pre-treated with 6,  
1240 12, 18, 24, and 30  $\mu\text{M}$  of nystatin for 1 h and subsequently infected with *C. difficile* spores  
1241 R20291 pre-incubated for 1 h with FBS. **c** Colony-forming units of spores on BHIS-CC  
1242 with 0.1% of sodium taurocholate of a lysate of undifferentiated Caco-2 were pre-treated  
1243 with 30  $\mu\text{M}$  of nystatin (shown as NYS) or DMEM alone as control and infected with *C.*  
1244 *difficile* spores, washed, and then treated with sodium taurocholate and ethanol (shown as  
1245 EtOH). The cells were lysed and plated, so only spores that remain dormant after treating  
1246 the cells with taurocholate (dormant) germinate in the plates. The number of CFU  $\text{mL}^{-1}$

1247 was determined, and the percentage of adherence relative to the control. Loops of  
1248 approximately ~1.5 cm of the ileum and colon of C57BL/6 were injected with  $3 \times 10^8$  *C.*  
1249 *difficile* R20291 with 250 nmol of RGD peptide ( $n = 4$ ), or 17,000 UI  $\text{kg}^{-1}$  nystatin ( $n = 4$ )  
1250 and saline (0.9% NaCl) as Ctrl ( $n = 4$ ). **d–f** Representative confocal micrographs *C. difficile*  
1251 spore is shown in red, F-actin is shown in green and nuclei in blue (fluorophores colors  
1252 were digitally reassigned for a better representation). The white arrow indicates internalized  
1253 *C. difficile* spores, empty arrow indicates adhered *C. difficile* spore. Quantification of spots  
1254 number (spores) per  $10^5 \mu\text{m}^2$  of **g** internalized and **h** adhered spores in the ileum mucosa or  
1255 **i** internalized and **j** adhered spores in the colonic mucosa in of C57BL/6. **k** Schematics of  
1256 the experimental design of a mouse model of R-CDI. ATB cocktail treated C57BL/6 mice  
1257 were infected with  $6 \times 10^7$  R20291 spores. The CDI symptoms were treated from days 3 to  
1258 7 with the inhibitor of spore internalization, nystatin and vancomycin (shown as  
1259 VAN+NYS) ( $n = 18$ ) or vancomycin alone as control (shown as VAN) ( $n = 23$ ) and were  
1260 monitored daily for **l** relative weight during the R-CDI. Weight loss comparison for animals  
1261 treated with **m** vancomycin or **n** vancomycin and nystatin and **o** onset to diarrhea during the  
1262 R-CDI. Error bars indicate the mean  $\pm$  S.E.M. Statistical analysis was performed by **a–c**,  
1263 Student's *t*-test, **g–j**; Mann-Whitney test; **l**, Kruskal- Wallis, post-Dunn's; **m, n**, Wilcoxon  
1264 matched-pairs signed-rank test; **o**, Log-rank (Mantel-Cox) test; ns indicates non-significant  
1265 differences, \*  $P < 0.05$ , \*\* $P < 0.001$ .

1266

1267

1268 **Extended Data Figure Legends**

1269

1270 **Extended Data Fig. 1 | Adherence of *C. difficile* spores to the colonic mucosa.** *z*-plane

1271 and orthogonal view of confocal micrographs of fixed whole-mount colonic tissue of mice.

1272 Panels **a–c, g** micrographs of colon of C57BL/6 mice infected in a colonic loop model with

1273  $5 \times 10^8$  *C. difficile* R20291 spores for 5 h. *C. difficile* spores are shown in red, F-actin is

1274 shown in green and nuclei in blue (fluorophores colors were digitally reassigned for a better

1275 representation). Panels **d–f, h** are a magnification of panels **a–c, g** respectively.

1276 Highlighted are *C. difficile* spores close the apical membrane of cells. Micrographs are

1277 representative of 3 independent mice. Bars **a–c, g** 50  $\mu\text{m}$ , **d–f, h** 10  $\mu\text{m}$ .

1278

1279 **Extended Data Fig. 2 | Adherence of *C. difficile* spores to the intestinal mucosa.** *z*-plane

1280 and orthogonal view of confocal micrographs of fixed whole-mount colonic tissue of mice.

1281 Panels **a–c, g** micrographs of ileum mucosa of C57BL/6 mice infected in an ileal loop

1282 model with  $5 \times 10^8$  spores *C. difficile* R20291 spores for 5 h. *C. difficile* spores are shown

1283 in red, F-actin is shown in green and nuclei in blue (fluorophores colors were digitally

1284 reassigned for a better representation). Panels **d–f, h** are a magnification of panels **a–c, g**

1285 respectively. Highlighted are *C. difficile* spores close the apical membrane of cells.

1286 Micrographs are representative of 3 independent mice. Bars **a–c, g**, 50  $\mu\text{m}$ , **d–f, h**, 10  $\mu\text{m}$ .

1287

1288 **Extended Data Fig. 3 | Internalization of *C. difficile* spores to the colonic mucosa *in***

1289 *vivo*. *z*-plane and orthogonal view of confocal micrographs of fixed whole-mount colonic

1290 tissue of mice. Panels **a–c, g**, Confocal micrographs of the colonic mucosa of C57BL/6

1291 mice infected in a colonic loop model with  $5 \times 10^8$  *C. difficile* R20291 spores for 5 h. *C.*  
1292 *difficile* spores are shown in red, F-actin is shown in green and nuclei in blue (fluorophores  
1293 colors were digitally reassigned for a better representation). Panels **d–f, h** are a  
1294 magnification of panels **a–c, g**, respectively. Highlighted are *C. difficile* spores close the  
1295 apical membrane of cells. Micrographs are representative of 3 independent mice. Bars **a–c,**  
1296 **g**, 50  $\mu\text{m}$ , **d–f, h**, 10  $\mu\text{m}$ .

1297

1298 **Extended Data Fig. 4 | Internalization of *C. difficile* spores into the intestinal mucosa.**

1299 z-plane and orthogonal view of confocal micrographs of fixed whole-mount colonic tissue  
1300 of mice. Panels **a–c** micrographs of the ileum mucosa of C57BL/6 mice infected in an ileal  
1301 loop model with  $5 \times 10^8$  spores *C. difficile* R20291 spores for 5 h. *C. difficile* spores are  
1302 shown in red, F-actin is shown in green and nuclei in blue (fluorophores colors were  
1303 digitally reassigned for a better representation). Panels **d–f, h** are magnification of panels  
1304 **a–c, g** respectively. Highlighted are *C. difficile* spores close the apical membrane of cells.  
1305 Micrographs are representative of 3 independent mice. Bars **a–c, g** 50  $\mu\text{m}$ , **d–f, h** 10  $\mu\text{m}$ .

1306

1307 **Extended Data Fig. 5 | Distribution of internalized *C. difficile* spore in colonic and in**

1308 **ileum mucosa. a** Schematics of the method applied for measurements of distances of  
1309 internalized spores in the ileum mucosa. Distribution of the distance of internalized *C.*  
1310 *difficile* spores to the **b** villus tip or to **c** the villus membrane. **d** Schematics of the method  
1311 applied for measurements of distances of internalized spores in the colonic mucosa. **e**  
1312 Distribution of the distance of internalized *C. difficile* spores to the colonic epithelium  
1313 surface or **f** to the closest crypt axis. In the ileum, distance from 34 internalized *C. difficile*



1314 spores to the villus tip and the distance of 54 internalized *C. difficile* spores to the villus  
1315 membrane is shown. In the colon, the distance of 61 internalized *C. difficile* spores was  
1316 evaluated.

1317

1318 **Extended Data Fig. 6 | Confocal microscopy of internalized *C. difficile* spores into**  
1319 **intestinal epithelial cells *in vitro*.** *z*-plane and orthogonal view of confocal micrographs of  
1320 **a, b** polarized T84 cells infected with NHS-treated R20291 spores for 5 h. **c, d** Intestinal  
1321 epithelial Caco-2 cells infected with NHS-treated *C. difficile* R20291 spores. *C. difficile*  
1322 spores are shown in red, F-actin is shown in green, (fluorophores colors were digitally  
1323 reassigned for a better representation). Scale bar, 10  $\mu$ m.

1324

1325 **Extended Data Fig. 7 | Internalized spores are not stained with anti-*C. difficile* spore**  
1326 **goat serum in non-permeabilized cells, and serum increases the internalization into**  
1327 **Caco-2 cells.** **a**, Cells were infected for 3 h with FBS treated *C. difficile* R20291 spores,  
1328 and without permeabilization, spores were immunodetected as is described in methods.  
1329 Bright spores that were not detected with fluorescent-labeled antibodies were considered as  
1330 internalized. Dynamic of *C. difficile* spore-entry of spores pre-incubated with FBS in  
1331 infected **i** Caco-2, and **j** T84 cells for 3h in the presence of 10% FBS. **k** Internalization of  
1332 *C. difficile* spores of clinical isolates of various ribotypes into Caco-2 cells. Error bars  
1333 indicate the mean  $\pm$  S.E.M. Statistical analysis was performed by Student's *t*-test. ns,  
1334 indicates non-significant differences, \**P* < 0.01.

1335

1336 **Extended Data Fig. 8 | The spore entry into Caco-2 cell line in the presence of normal**

1337 **human serum is inhibited by RGD peptide. a–b** Caco-2 cells monolayer differentiated,  
1338 and **c–f** undifferentiated. **a, c, e** show relative internalization while **b, d, f** shows relative  
1339 adherence compared to the control ( $0 \mu\text{g mL}^{-1}$  RGD). Before the infection, spores were  
1340 incubated with **a, b, e, f** culture media; **c, d** with NHS. Cells were incubated with 0 and 5  
1341  $\mu\text{g mL}^{-1}$  of RGD peptide and infected with R20291 *C. difficile* spores pre-incubated with  
1342 DMEM (without serum) or NHS. The data represents the mean of three biological  
1343 experiments. Error bars indicate the mean  $\pm$  S.E.M. Statistical analysis was performed by  
1344 Student's *t*-test, ns, indicates non-significant differences,  $*P < 0.0001$ .

1345

1346 **Extended Data Fig. 9 | *C. difficile* spore entry of *C. difficile* spore pre-incubated Fn**  
1347 **and Vn and Caco-2 cells pre-incubated Fn and Vn. a–d** Caco-2 cells monolayers  
1348 undifferentiated and **e, f** 8 days differentiated. **a, c, e** shows relative internalization, while **b**  
1349 **d, f** shows relative adherence compared to the control (DMEM). Before infecting cells, **a, b**  
1350 spores or **c, d** Caco-2 cells were pre-treated with NHS, Fn or Vn, and subsequently infected  
1351 with *C. difficile* R20291 spores. The data represents the mean of three biological  
1352 experiments. Error bars indicate the mean  $\pm$  S.E.M. Statistical analysis was performed by  
1353 Student's *t*-test, ns indicates non-significant differences  $*P < 0.005$ ;  $**P < 0.001$ .

1354

1355 **Extended Data Fig. 10 | Accessibility Muc2 in the small intestine. a** Confocal  
1356 micrographs of fixed whole-mounted healthy colon of C57BL/6 mice for acc Muc2 with  
1357 acc Ecad. The main figure shown a 3D projection, below magnifications and a z-stack of  
1358 representative cells with the different immunostaining. **b** Shown the cell repartition of cells  
1359 immunodetected for acc Ecad. **c** Cell repartition of cells immunodetected for Muc2. **d** Cell

1360 repartition of total acc Muc2 cells that were immunodetected for acc E-cad. Acc-Muc2 is  
1361 shown in green Acc Ecad is shown in red and F-actin in grey (fluorophores colors were  
1362 digitally reassigned for a better representation). Scale bar, 20 $\mu\text{m}$ , in magnifications 10 $\mu\text{m}$ .  
1363 Micrographs are representative of mice ( $n = 2$ ). 1,000 - 1,200 cells were counted for each  
1364 mouse in an area 84,628 $\mu\text{m}^2$ . Error bars indicate mean  $\pm$  S.E.M.

1365

1366 **Extended Data Fig. 11 | The spore entry into Caco-2 cells mediated by Fn occurs**  
1367 **through integrin subunits  $\alpha_5$  and  $\beta_1$ ; while internalization mediated Vn is through**  
1368 **integrin subunits  $\alpha_v$  and  $\beta_1$ . a–f** undifferentiated and **g, h** differentiated Caco-2 cell  
1369 monolayer, and were pre-incubated with **a–d** 1, 3 or 5  $\mu\text{g mL}^{-1}$  of RGD peptide or **e–h** 10  
1370  $\mu\text{g mL}^{-1}$  of antibody against  $\alpha_v$ ,  $\alpha_2$ ,  $\alpha_5$ ,  $\beta_1$ ,  $\beta_3$ , non-immune IgG antibody in DMEM and  
1371 infected with *C. difficile* R20291 spores pre-incubated with 10  $\mu\text{g mL}^{-1}$  **a, b, e, f** Fn, or **c,**  
1372 **d, g, h** Vn. **a, c, e, g** Show relative internalization while **b, d, f, h** relative adherence  
1373 compared to the control (no RGD or non-immune IgG antibody). Error bars indicate the  
1374 mean  $\pm$  S.E.M. Statistical analysis was performed by Student's *t*-test, ns indicates non-  
1375 significant differences,  $P < 0.01$ ,  $**P < 0.001$ .

1376

1377 **Extended Data Fig. 12 | Serum-free medium does not promote internalization of *C.***  
1378 ***difficile* spores dependent of integrins  $\alpha_v$ ,  $\alpha_5$ , and  $\beta_1$ . a** Internalization or **b** adherence of  
1379 *C. difficile* pre-treated 1 h with DMEM in CHO cells ectopically expressing  $\alpha_v$ ,  $\alpha_5$ ,  $\beta_1$   
1380 integrins relative to the control (wild-type CHO cells). Error bars indicate the mean  $\pm$   
1381 S.E.M. Statistical analysis was performed by Student's *t*-test, ns indicates non-significant  
1382 differences,  $P < 0.01$ ,  $**P < 0.001$ .

1383

1384 **Extended Data Fig. 13 | Quantification of *C. difficile* spores associated with Fn and Vn**  
1385 **by TEM. a, b,** percentage of the total of labeled spores treated with Fn or Vn (Fn + or Vn +  
1386 respectively) and the negative control without protein (Fn - or Vn - as appropriate). Error  
1387 bars indicate the mean  $\pm$  S.E.M. Statistical analysis was performed by Student's *t*-test, ns  
1388 indicates non-significant differences, \**P* < 0.001.

1389

1390 **Extended Data Fig. 14 | Deletion of *bclA3* genes in R20291.** The deletion of *bclA3* was  
1391 done by allelic exchange through a schematic representation of the deletion of *bclA3*,  
1392 leaving a small peptide in frame. Construction and characterization of *bclA3* mutant in *C.*  
1393 *difficile*. **a** Schematic representation of in-frame deletion of *bclA3*. **b** The size of *bclA3* loci  
1394 was verified by PCR using detection primers (Table S2).

1395

1396 **Extended Data Fig. 15 | Immunofluorescence intensity of the anti-spore in *bclA3***  
1397 **mutant**

1398 ***C. difficile* spores. a** Wild-type ( $\Delta pyrE/pyrE^+$ ),  $\Delta bclA3$  and  $\Delta bclA3/bclA3^+$  R20291 spores  
1399 are recognized by anti-*C. difficile* spore goat serum.  $\Delta pyrE/pyrE^+$ , (wild-type; wt),  $\Delta bclA3$ ,  
1400 and complemented mutant ( $\Delta bclA3/bclA3^+$ ) R20291 spores were fixed on glass coverslips  
1401 treated with poly-lysine; then the samples were blocked with PBS–1% BSA and were  
1402 labeled for 1 h with goat-anti-spore serum and incubated with secondary antibody anti-goat  
1403 CFL 488-conjugated; then, micrograph were captured with epifluorescence microscopy. **b**  
1404 Quantitative analysis of the fluorescence (Fl.) intensity in spores of  $\Delta pyrE/pyrE^+$  (dark  
1405 line),  $\Delta bclA3$  (red line) and  $\Delta bclA3/bclA3^+$  (blue line), the values shown in the graphs the

1406 normalized fluorescence intensity from 150 spores of  $\Delta pyrE/pyrE^+$ ,  $\Delta bclA3$  and  
1407  $\Delta bclA3/bclA3^+$  strain. **c** Distribution of the fluorescence intensity of wild-type (dark bars),  
1408  $\Delta bclA3$  (red bars) and  $\Delta bclA3/bclA3^+$  (blue bars) spores.

1409

1410 **Extended Data Fig. 16 | Effect of absence of BclA3 on spore-entry and adherence to**  
1411 **non-phagocytic cells.** Relative *C. difficile* spore **a, c** internalization and **b, d** adherence of  
1412 HeLa cells infected with *C. difficile* spores  $\Delta pyrE/pyrE^+$  (wild-type),  $\Delta bclA3$ , and  
1413  $\Delta bclA3/bclA3^+$  pre-incubated with 10  $\mu\text{g}$  of **a, b** Fn or **c, d** Vn. **e–h** shown the relative *C.*  
1414 *difficile* spore adherence of CHO cells ectopically expressing integrins; **e**, CHO- $\alpha_5$ , **f, h**  
1415 CHO- $\beta_1$  and **g** CHO- $\alpha_v$  and infected with *C. difficile* spores  $\Delta pyrE/ pyrE^+$  (wild-type),  
1416  $\Delta bclA3$ , and  $\Delta bclA3/bclA3^+$  pre-incubated with 10  $\mu\text{g}$  of **e, f** Fn or **g, h** Vn. The data  
1417 represents the mean of three biological experiments. Error bars indicate the mean  $\pm$  S.E.M.  
1418 Statistical analysis was performed by Student's *t*-test, ns indicates non-significant  
1419 differences,  $*P < 0.001$ .

1420

1421 **Extended Data Fig. 17 | Representative confocal micrograph of adhered and**  
1422 **internalized *C. difficile* spores in colonic mucosa with  $\Delta bclA3$  spores and Extended**  
1423 **data of BclA exosporium protein contributes to the recurrence of *C. difficile* infection.**

1424 There are supplementary figures of the experiment detailed in Fig 6. Confocal micrograph  
1425 of the whole-mount fixed colon. C57BL/6 mice infected in a colonic loop model with  $5 \times$   
1426  $10^8$  *C. difficile* R20291 spores. Panels shown confocal micrographs of adhered and  
1427 internalized spores in colon loop infected with strains **a** wild-type ( $\Delta pyrE/pyrE^+$ ), **b**

1428  $\Delta bclA3$ , and **c**  $\Delta bclA3/bclA3^+$ . The main figure shown a 3D projection, below the z-stack,  
1429 magnification, and the orthogonal view. *C. difficile* spores are shown in red, F-actin is  
1430 shown in green and nuclei in blue (fluorophores colors were digitally reassigned for a better  
1431 representation). The white arrow indicates internalized *C. difficile* spores, empty arrow  
1432 indicates adhered *C. difficile* spore. Micrograph are representative of mice wild type ( $n =$   
1433 10);  $\Delta bclA3$  ( $n = 12$ ) and  $\Delta pyrE/pyrE^+$  ( $n = 11$ ). These are supplementary figures from the  
1434 experiment of R-CDI in animals infected with  $\Delta bclA3$  spores (Fig. 6). Animals were  
1435 infected with wild-type ( $\Delta pyrE/pyrE^+$ ;  $n = 10$ ),  $\Delta bclA3$  ( $n = 16$ ) and  $\Delta bclA3/bclA3^+$ , ( $n =$   
1436 14) and were monitored daily for **d** relative weight; **e** time to diarrhea during CDI. **f** *C.*  
1437 *difficile* spore CFU in feces during CDI and R-CDI. Spore adherence to the colonic tract  
1438 was evaluated on day 11 to **g** Cecum, **h** proximal colon, **i** distal colon and, **j** cytotoxicity of  
1439 the cecal content. Error bars indicate the mean  $\pm$  S.E.M. Statistical analysis was performed  
1440 by **d, f**, Kruskal- Wallis, post-Dunn's test, **e**, Log-rank (Mantel-Cox), **g-j**, Mann-Whitney  
1441 test, ns indicates non-significant differences, \*  $P < 0.05$ , \*\* $P < 0.01$ , \*\*\* $P < 0.001$ . Scare  
1442 bar, 20 $\mu$ m.

1443

1444 **Extended Data Fig. 18 | Extended data of Fig 7.** These are supplementary figures from  
1445 the experiment detailed in Fig 7. *C. difficile* spore **a** internalization and **b** adherence in  
1446 monolayers of T84; cells were pre-treated with 30  $\mu$ M of nystatin (shown as NYS) for 1 h  
1447 and were subsequently infected with *C. difficile* spores R20291 pre-treated for 1 h with  
1448 FBS. **c** Cellular viability after nystatin treatment was determined by using MTT assay. **d-f**  
1449 Confocal micrograph of the whole-mount fixed colon. C57BL/6 mice infected in a colonic  
1450 loop model with  $5 \times 10^8$  *C. difficile* R20291 spores. Panels shown adhered and internalized

1451 spores of **d** untreated mice (Ctrl), **e** mice treated 24h before the surgery with nystatin, and  
1452 administered in the loop in the presence of: **f** 250 nmol of RGD peptide in the loop. The  
1453 main figure shown a 3D projection, below the z-stack, magnification, and the orthogonal  
1454 view. *C. difficile* spores are shown in red, F-actin is shown in green and nuclei in blue  
1455 (fluorophores colors were digitally reassigned for a better representation). White arrow  
1456 indicates internalized *C. difficile* spores, empty arrow indicates adhered *C. difficile* spore.  
1457 Micrographs are representative of mice ( $n = 4$ ). These are supplementary figures from the  
1458 experiment of R-CDI with animals treated with nystatin and RGD. Animals were infected  
1459 with *C. difficile* R20291 and were monitored daily for **g** weight loss, **h** diarrhea, and **i** *C.*  
1460 *difficile* spore CFU in feces during CDI and R-CDI. For mice treated with nystatin and  
1461 vancomycin ( $n = 18$ ) or vancomycin alone as control ( $n = 23$ ) from days 3-7. Vancomycin  
1462 is shown as VAN. Error bars indicate the mean  $\pm$  S.E.M. Statistical analysis was performed  
1463 by **a, b**, Student's *t*-test, **f** and **h**, Kruskal-Wallis, post-Dunn's test, **g**, Log-rank (Mantel-  
1464 Cox), ns indicates non-significant differences, \* $P < 0.05$ , \*\* $P < 0.01$ , \*\*\* $P < 0.001$ . Scale  
1465 bar, 20 $\mu$ m.

1466

## 1467 **Supplementary Videos**

1468

### 1469 **Video 1. Wild-type *C. difficile* spores internalize in colonic mucosa.**

1470 Travel through a confocal Z-stack from the apical face of the colonic mucosa. *C. difficile*  
1471 spore is shown in red, F-actin is shown in green and nuclei in blue (fluorophores colors  
1472 were digitally reassigned for a better representation). Arrows indicate internalized spores.

1473

1474 **Video 2. Wild-type *C. difficile* spores internalize in the ileum mucosa.**

1475 Travel through a confocal Z-stack from the apical face of the ileum mucosa. *C. difficile*

1476 spore is shown in red, F-actin is shown in green and nuclei in blue (fluorophores colors

1477 were digitally reassigned for a better representation). Arrows indicate internalized spores.



# Figure 1

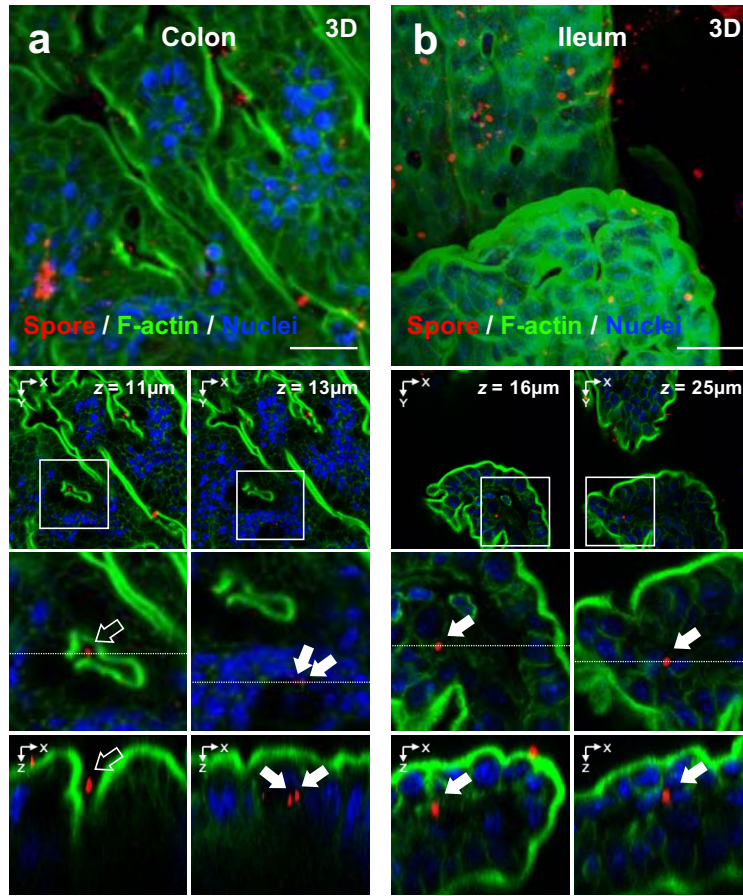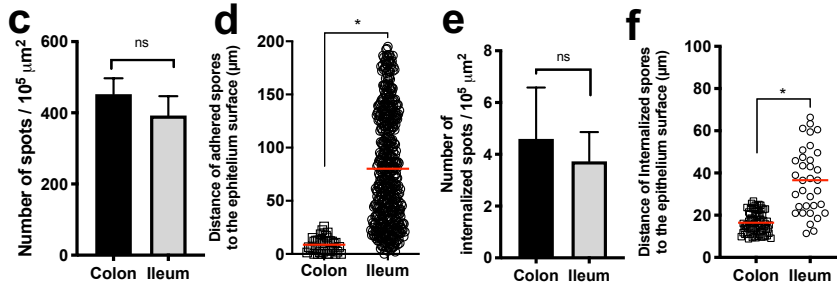

# Figure 2

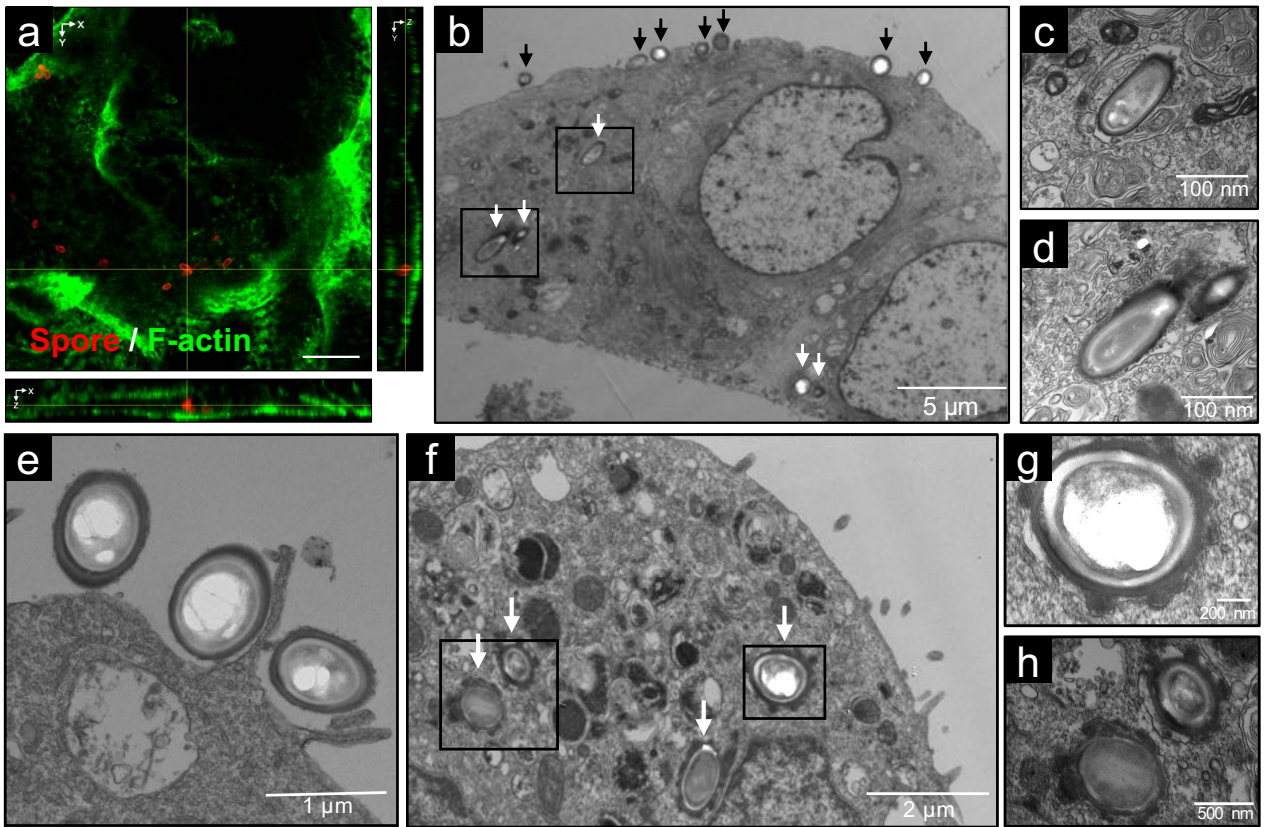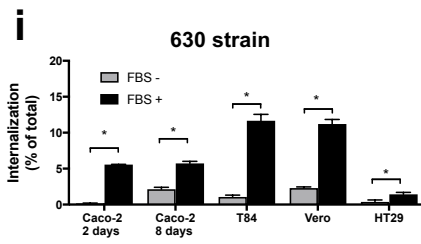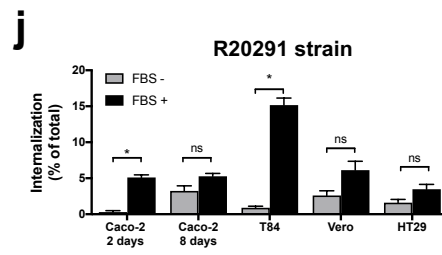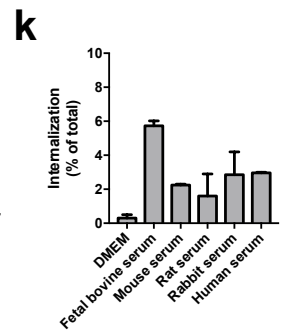

# Figure 3

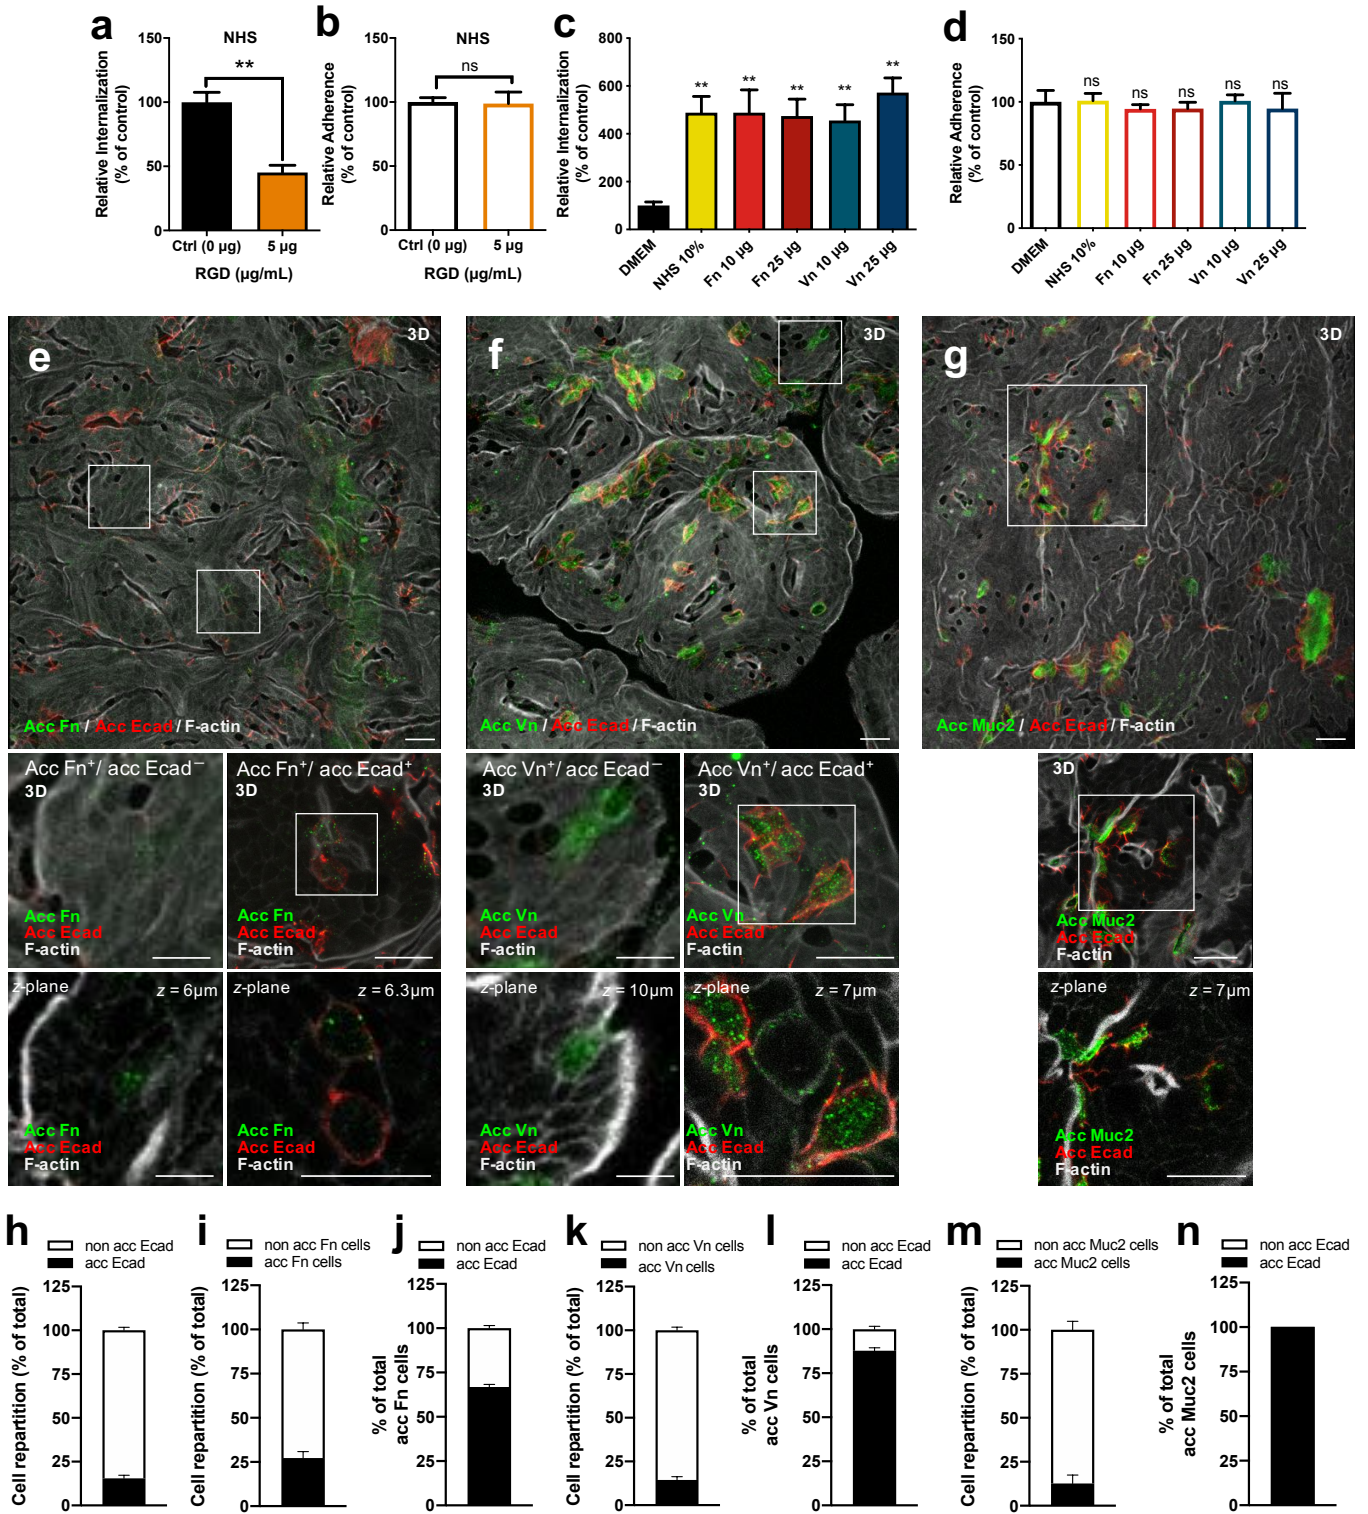

# Figure 4

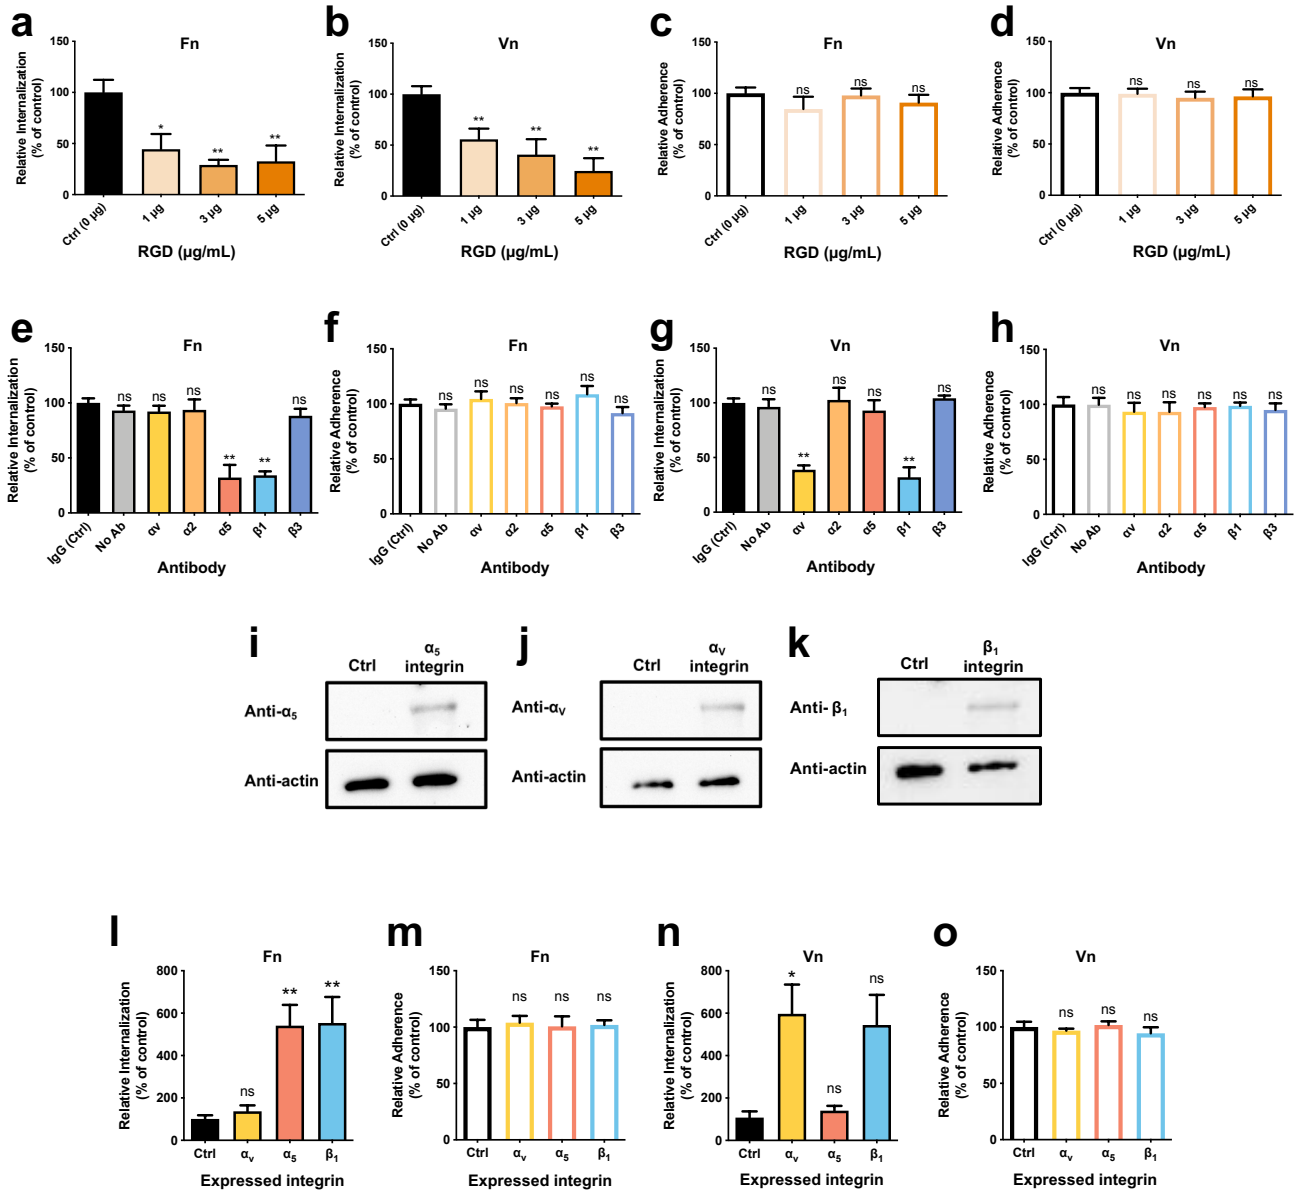

**Figure 5**

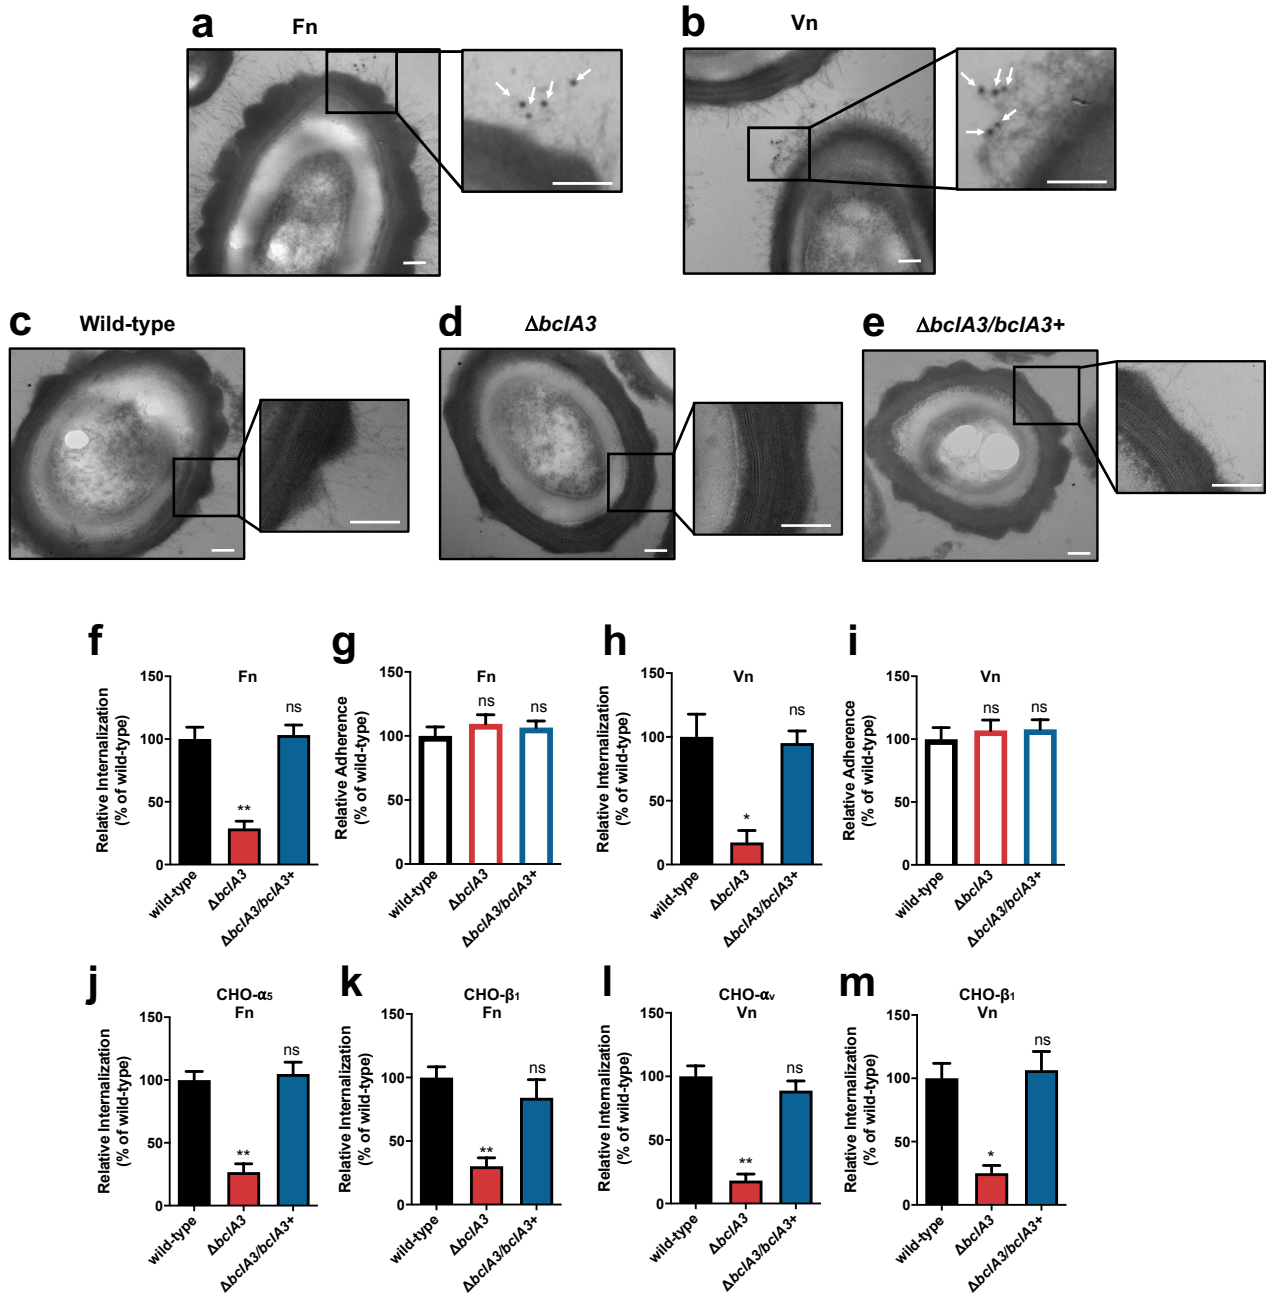

**Figure 6**

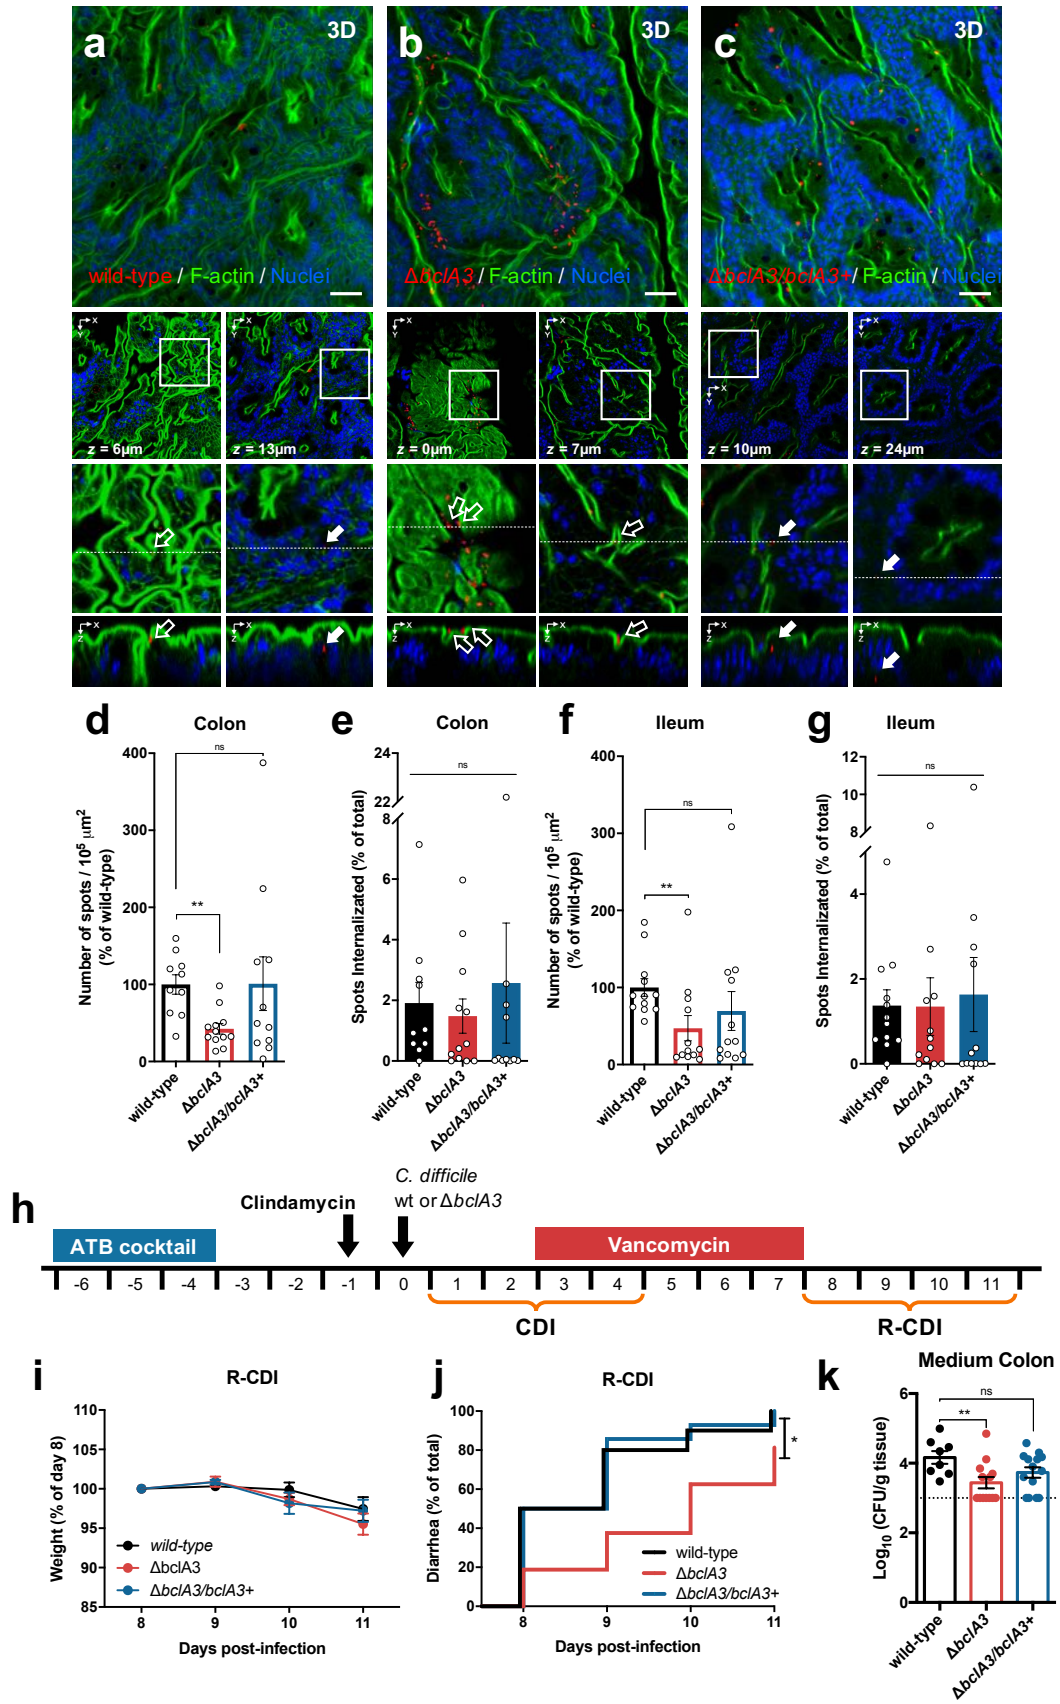

# Figure 7

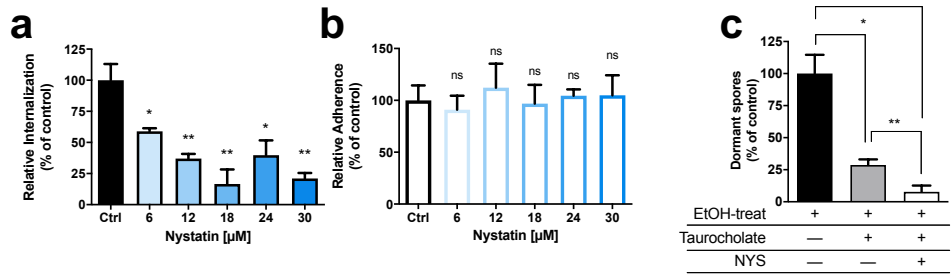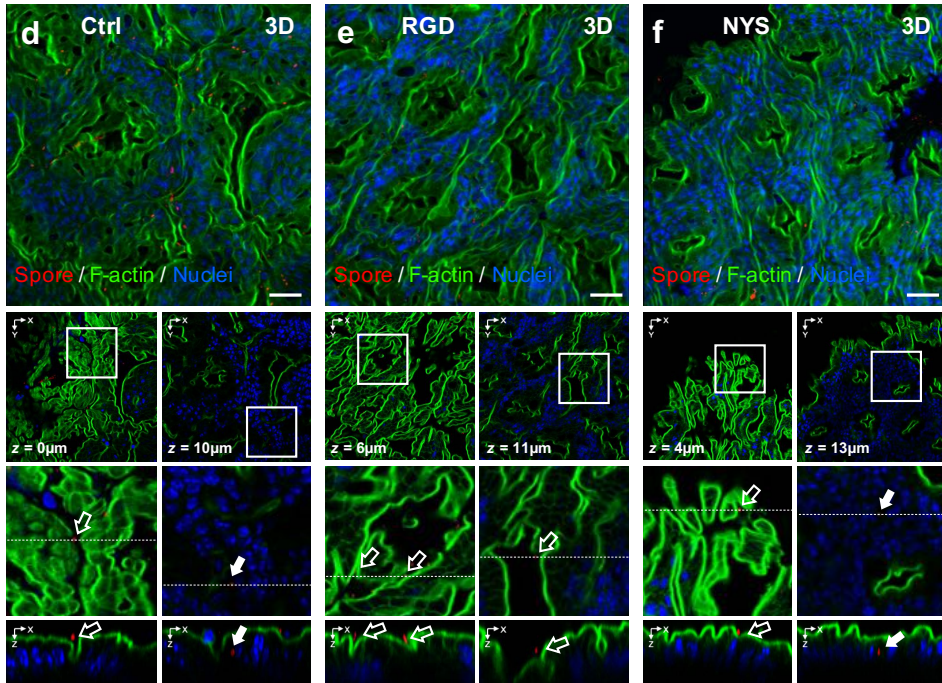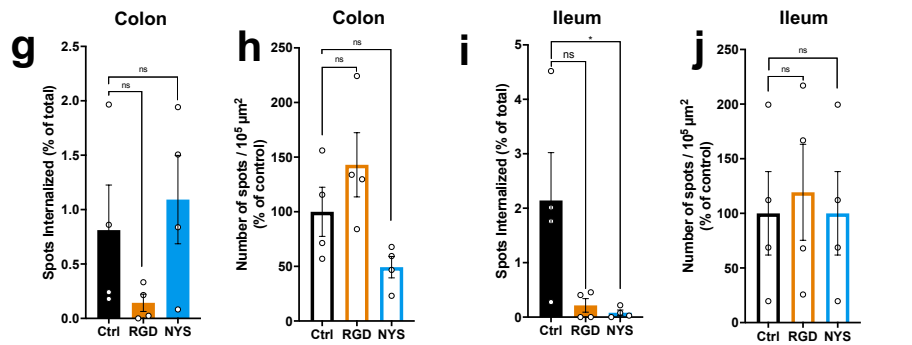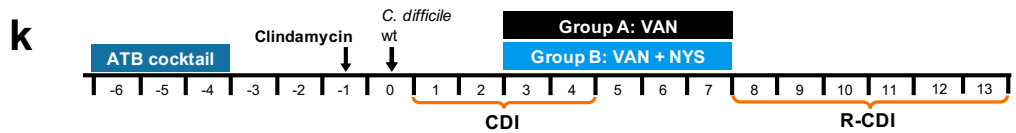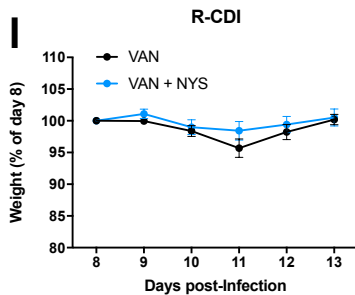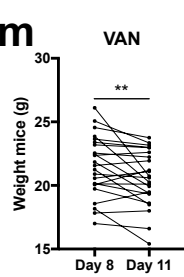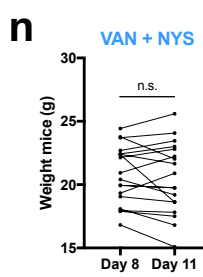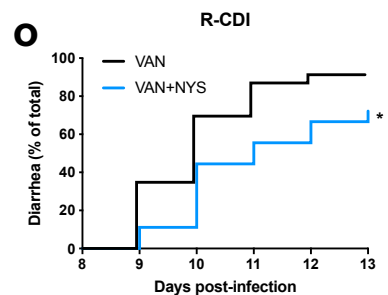

Source: https://www.biorxiv.org/content/10.1101/2020.09.11.291104v1.full.pdf
